# Supplementary material for: Microbial Ecology of the Hive and Pollination Landscape: Bacterial Associates from Floral Nectar, the Alimentary Tract and Stored Food of Honey Bees (Apis mellifera)
Source: PLoS One. 2013 Dec 17;8(12):e83125. doi: 10.1371/journal.pone.0083125 (PMC3866269; doi:10.1371/journal.pone.0083125)
Supplement: Table S2 — Accessions, RDP classifications and NCBI hits for crop isolates. (XLSX) [file pone.0083125.s004.xlsx]

## Sheet: MRS 02-01-10 
Table S2. Accession numbers and RDP and NCBI classifications for crop culture isolates
Source (Tissue/Pollen)	Accession	Date of Collection	Isolte #	Colony	Alimentary Tract	Media	Cultureing Environment	Primers Used for Sequence	Domain		Phylum		Class		Order		Family		Genus		NCBI Hits and %Identity
Crop	KF599105	2010-02-01	H3_5_2M	P3	5	MRS	CO2	ENV1&ENV2	Bacteria	1	Firmicutes	1	Bacilli	1	Lactobacillales	1	Lactobacillaceae	1	Lactobacillus	1	Full Lactobacillus kunkeei strain 100-1 16S ribosomal RNA gene, partial sequence 99%	JQ009336.1
Crop	KF599114	2010-02-01	H6_1M	P6	1	MRS	CO2	ENV1&ENV2	Bacteria	1	Firmicutes	1	Bacilli	1	Lactobacillales	1	Lactobacillaceae	1	Lactobacillus	1	Full Lactobacillus kunkeei strain 100-1 16S ribosomal RNA gene, partial sequence 99%	JQ009336.1
Crop	KF599128	2010-02-01	H7_11_1M	P7	11	MRS	CO2	ENV1&ENV2	Bacteria	1	Firmicutes	1	Bacilli	1	Lactobacillales	1	Lactobacillaceae	1	Lactobacillus	1	Full Lactobacillus kunkeei strain 100-1 16S ribosomal RNA gene, partial sequence 99%	JQ009336.1
Crop	KF599080	2010-02-01	H1_10_1M	P1	10	MRS	CO2	ENV1&ENV2	Bacteria	1	Firmicutes	1	Bacilli	1	Lactobacillales	1	Lactobacillaceae	0.99	Lactobacillus	0.98	Lactobacillus kunkeei strain 100-1 16S ribosomal RNA gene, partial sequence 98%	JQ009336.1
Crop	KF599082	2010-02-01	H1_11M	P1	1	MRS	CO2	ENV1&ENV2	Bacteria	1	Firmicutes	1	Bacilli	1	Lactobacillales	1	Lactobacillaceae	1	Lactobacillus	1	Lactobacillus kunkeei strain 100-1 16S ribosomal RNA gene, partial sequence 98%	JQ009336.1
Crop	KF599087	2010-02-01	H1_4M	P1	4	MRS	O2	ENV1&ENV2	Bacteria	1	Firmicutes	1	Bacilli	1	Lactobacillales	1	Lactobacillaceae	1	Lactobacillus	0.92	Lactobacillus kunkeei strain 100-1 16S ribosomal RNA gene, partial sequence 98%	JQ009336.1
Crop	KF599092	2010-02-01	H2_1_2M	P2	1	MRS	CO2	ENV1&ENV2	Bacteria	1	Firmicutes	1	Bacilli	1	Lactobacillales	1	Lactobacillaceae	1	Lactobacillus	0.98	Lactobacillus kunkeei strain 100-1 16S ribosomal RNA gene, partial sequence 98%	JQ009336.1
Crop	KF599101	2010-02-01	H2_5_3M	P2	5	MRS	CO2	ENV1&ENV2	Bacteria	1	Firmicutes	1	Bacilli	1	Lactobacillales	1	Lactobacillaceae	1	Lactobacillus	0.96	Lactobacillus kunkeei strain 100-1 16S ribosomal RNA gene, partial sequence 98%	JQ009336.1
Crop	KF599110	2010-02-01	H6_1	P6	1	MRS	O2	ENV1&ENV2	Bacteria	1	Firmicutes	1	Bacilli	1	Lactobacillales	1	Lactobacillaceae	1	Lactobacillus	1	Lactobacillus kunkeei strain 100-1 16S ribosomal RNA gene, partial sequence 98%	JQ009336.1
Crop	KF599124	2010-02-01	H6_8_2M	P6	8	MRS	CO2	ENV1&ENV2	Bacteria	1	Firmicutes	1	Bacilli	1	Lactobacillales	1	Lactobacillaceae	1	Lactobacillus	0.98	Lactobacillus kunkeei strain 100-1 16S ribosomal RNA gene, partial sequence 98%	JQ009336.1
Crop	KF599131	2010-02-01	H7_4_3M	P7	4	MRS	CO2	ENV1&ENV2	Bacteria	1	Firmicutes	1	Bacilli	1	Lactobacillales	1	Lactobacillaceae	0.97	Lactobacillus	0.88	Lactobacillus kunkeei strain 100-1 16S ribosomal RNA gene, partial sequence 98%	JQ009336.1
Crop	KF599132	2010-02-01	H7_7M	P7	7	MRS	CO2	ENV1&ENV2	Bacteria	1	Firmicutes	1	Bacilli	1	Lactobacillales	1	Lactobacillaceae	1	Lactobacillus	0.99	Lactobacillus kunkeei strain 100-1 16S ribosomal RNA gene, partial sequence 98%	JQ009336.1
Crop	KF599081	2010-02-01	H1_10_2M	P1	10	MRS	CO2	ENV1&ENV2	Bacteria	1	Firmicutes	1	Bacilli	1	Lactobacillales	1	Lactobacillaceae	1	Lactobacillus	1	Lactobacillus kunkeei strain 100-1 16S ribosomal RNA gene, partial sequence 99%	JQ009336.1
Crop	KF599083	2010-02-01	H1_1M	P1	1	MRS	O2	ENV1&ENV2	Bacteria	1	Firmicutes	1	Bacilli	1	Lactobacillales	1	Lactobacillaceae	1	Lactobacillus	1	Lactobacillus kunkeei strain 100-1 16S ribosomal RNA gene, partial sequence 99%	JQ009336.1
Crop	KF599084	2010-02-01	H1_1M	P1	1	MRS	CO2	ENV1&ENV2	Bacteria	1	Firmicutes	1	Bacilli	1	Lactobacillales	1	Lactobacillaceae	1	Lactobacillus	1	Lactobacillus kunkeei strain 100-1 16S ribosomal RNA gene, partial sequence 99%	JQ009336.1
Crop	KF599085	2010-02-01	H1_2M	P1	2	MRS	CO2	ENV1&ENV2	Bacteria	1	Firmicutes	1	Bacilli	1	Lactobacillales	1	Lactobacillaceae	1	Lactobacillus	1	Lactobacillus kunkeei strain 100-1 16S ribosomal RNA gene, partial sequence 99%	JQ009336.1
Crop	KF599086	2010-02-01	H1_3M	P1	3	MRS	CO2	ENV1&ENV2	Bacteria	1	Firmicutes	1	Bacilli	1	Lactobacillales	1	Lactobacillaceae	1	Lactobacillus	1	Lactobacillus kunkeei strain 100-1 16S ribosomal RNA gene, partial sequence 99%	JQ009336.1
Crop	KF599088	2010-02-01	H1_5_1	P1	5	MRS	CO2	ENV1&ENV2	Bacteria	1	Firmicutes	1	Bacilli	1	Lactobacillales	1	Lactobacillaceae	1	Lactobacillus	1	Lactobacillus kunkeei strain 100-1 16S ribosomal RNA gene, partial sequence 99%	JQ009336.1
Crop	KF599089	2010-02-01	H1_5_2M	P1	5	MRS	CO2	ENV1&ENV2	Bacteria	1	Firmicutes	1	Bacilli	1	Lactobacillales	1	Lactobacillaceae	1	Lactobacillus	0.99	Lactobacillus kunkeei strain 100-1 16S ribosomal RNA gene, partial sequence 99%	JQ009336.1
Crop	KF599090	2010-02-01	H1_7M	P1	7	MRS	CO2	ENV1&ENV2	Bacteria	1	Firmicutes	1	Bacilli	1	Lactobacillales	1	Lactobacillaceae	1	Lactobacillus	1	Lactobacillus kunkeei strain 100-1 16S ribosomal RNA gene, partial sequence 99%	JQ009336.1
Crop	KF599091	2010-02-01	H1_8M	P1	8	MRS	CO2	ENV1&ENV2	Bacteria	1	Firmicutes	1	Bacilli	1	Lactobacillales	1	Lactobacillaceae	1	Lactobacillus	1	Lactobacillus kunkeei strain 100-1 16S ribosomal RNA gene, partial sequence 99%	JQ009336.1
Crop	KF599093	2010-02-01	H2_1_2M	P2	1	MRS	O2	ENV1&ENV2	Bacteria	1	Firmicutes	1	Bacilli	1	Lactobacillales	1	Lactobacillaceae	1	Lactobacillus	1	Lactobacillus kunkeei strain 100-1 16S ribosomal RNA gene, partial sequence 99%	JQ009336.1
Crop	KF599094	2010-02-01	H2_2_2M	P2	2	MRS	CO2	ENV1&ENV2	Bacteria	1	Firmicutes	1	Bacilli	1	Lactobacillales	1	Lactobacillaceae	1	Lactobacillus	1	Lactobacillus kunkeei strain 100-1 16S ribosomal RNA gene, partial sequence 99%	JQ009336.1
Crop	KF599095	2010-02-01	H2_2M	P2	2	MRS	CO2	ENV1&ENV2	Bacteria	1	Firmicutes	1	Bacilli	1	Lactobacillales	1	Lactobacillaceae	1	Lactobacillus	1	Lactobacillus kunkeei strain 100-1 16S ribosomal RNA gene, partial sequence 99%	JQ009336.1
Crop	KF599097	2010-02-01	H2_3M	P2	3	MRS	CO2	ENV1&ENV2	Bacteria	1	Firmicutes	1	Bacilli	1	Lactobacillales	1	Lactobacillaceae	1	Lactobacillus	1	Lactobacillus kunkeei strain 100-1 16S ribosomal RNA gene, partial sequence 99%	JQ009336.1
Crop	KF599098	2010-02-01	H2_4_2_M	P2	4	MRS	CO2	ENV1&ENV2	Bacteria	1	Firmicutes	1	Bacilli	1	Lactobacillales	1	Lactobacillaceae	1	Lactobacillus	1	Lactobacillus kunkeei strain 100-1 16S ribosomal RNA gene, partial sequence 99%	JQ009336.1
Crop	KF599099	2010-02-01	H2_5_1M	P2	5	MRS	CO2	ENV1&ENV2	Bacteria	1	Firmicutes	1	Bacilli	1	Lactobacillales	1	Lactobacillaceae	1	Lactobacillus	1	Lactobacillus kunkeei strain 100-1 16S ribosomal RNA gene, partial sequence 99%	JQ009336.1
Crop	KF599100	2010-02-01	H2_5_2M	P2	5	MRS	CO2	ENV1&ENV2	Bacteria	1	Firmicutes	1	Bacilli	1	Lactobacillales	1	Lactobacillaceae	1	Lactobacillus	1	Lactobacillus kunkeei strain 100-1 16S ribosomal RNA gene, partial sequence 99%	JQ009336.1
Crop	KF599102	2010-02-01	H3_1_1	P3	1	MRS	CO2	ENV1&ENV2	Bacteria	1	Firmicutes	1	Bacilli	1	Lactobacillales	1	Lactobacillaceae	1	Lactobacillus	1	Lactobacillus kunkeei strain 100-1 16S ribosomal RNA gene, partial sequence 99%	JQ009336.1
Crop	KF599103	2010-02-01	H3_1_2	P3	1	MRS	CO2	ENV1&ENV2	Bacteria	1	Firmicutes	1	Bacilli	1	Lactobacillales	1	Lactobacillaceae	1	Lactobacillus	1	Lactobacillus kunkeei strain 100-1 16S ribosomal RNA gene, partial sequence 99%	JQ009336.1
Crop	KF599104	2010-02-01	H3_3_2M	P3	3	MRS	CO2	ENV1&ENV2	Bacteria	1	Firmicutes	1	Bacilli	1	Lactobacillales	1	Lactobacillaceae	1	Lactobacillus	0.99	Lactobacillus kunkeei strain 100-1 16S ribosomal RNA gene, partial sequence 99%	JQ009336.1
Crop	KF599106	2010-02-01	H3_5M	P3	5	MRS	CO2	ENV1&ENV2	Bacteria	1	Firmicutes	1	Bacilli	1	Lactobacillales	1	Lactobacillaceae	1	Lactobacillus	1	Lactobacillus kunkeei strain 100-1 16S ribosomal RNA gene, partial sequence 99%	JQ009336.1
Crop	KF599107	2010-02-01	H3_8_1M	P3	8	MRS	CO2	ENV1&ENV2	Bacteria	1	Firmicutes	1	Bacilli	1	Lactobacillales	1	Lactobacillaceae	1	Lactobacillus	1	Lactobacillus kunkeei strain 100-1 16S ribosomal RNA gene, partial sequence 99%	JQ009336.1
Crop	KF599108	2010-02-01	H3_8_2M	P3	8	MRS	CO2	ENV1&ENV2	Bacteria	1	Firmicutes	1	Bacilli	1	Lactobacillales	1	Lactobacillaceae	1	Lactobacillus	1	Lactobacillus kunkeei strain 100-1 16S ribosomal RNA gene, partial sequence 99%	JQ009336.1
Crop	KF599109	2010-02-01	H3_8M	P3	8	MRS	CO2	ENV1&ENV2	Bacteria	1	Firmicutes	1	Bacilli	1	Lactobacillales	1	Lactobacillaceae	1	Lactobacillus	1	Lactobacillus kunkeei strain 100-1 16S ribosomal RNA gene, partial sequence 99%	JQ009336.1
Crop	KF599111	2010-02-01	H6_10_1M	P6	10	MRS	CO2	ENV1&ENV2	Bacteria	1	Firmicutes	1	Bacilli	1	Lactobacillales	1	Lactobacillaceae	1	Lactobacillus	1	Lactobacillus kunkeei strain 100-1 16S ribosomal RNA gene, partial sequence 99%	JQ009336.1
Crop	KF599112	2010-02-01	H6_10_2M	P6	10	MRS	CO2	ENV1&ENV2	Bacteria	1	Firmicutes	1	Bacilli	1	Lactobacillales	1	Lactobacillaceae	1	Lactobacillus	1	Lactobacillus kunkeei strain 100-1 16S ribosomal RNA gene, partial sequence 99%	JQ009336.1
Crop	KF599116	2010-02-01	H6_4	P6	4	MRS	CO2	ENV1&ENV2	Bacteria	1	Firmicutes	1	Bacilli	1	Lactobacillales	1	Lactobacillaceae	1	Lactobacillus	1	Lactobacillus kunkeei strain 100-1 16S ribosomal RNA gene, partial sequence 99%	JQ009336.1
Crop	KF599117	2010-02-01	H6_4M	P6	4	MRS	CO2	ENV1&ENV2	Bacteria	1	Firmicutes	1	Bacilli	1	Lactobacillales	1	Lactobacillaceae	1	Lactobacillus	1	Lactobacillus kunkeei strain 100-1 16S ribosomal RNA gene, partial sequence 99%	JQ009336.1
Crop	KF599121	2010-02-01	H6_7_1M	P6	7	MRS	CO2	ENV1&ENV2	Bacteria	1	Firmicutes	1	Bacilli	1	Lactobacillales	1	Lactobacillaceae	1	Lactobacillus	1	Lactobacillus kunkeei strain 100-1 16S ribosomal RNA gene, partial sequence 99%	JQ009336.1
Crop	KF599123	2010-02-01	H6_8_1M	P6	8	MRS	CO2	ENV1&ENV2	Bacteria	1	Firmicutes	1	Bacilli	1	Lactobacillales	1	Lactobacillaceae	1	Lactobacillus	1	Lactobacillus kunkeei strain 100-1 16S ribosomal RNA gene, partial sequence 99%	JQ009336.1
Crop	KF599125	2010-02-01	H6_9_1M	P6	9	MRS	CO2	ENV1&ENV2	Bacteria	1	Firmicutes	1	Bacilli	1	Lactobacillales	1	Lactobacillaceae	1	Lactobacillus	1	Lactobacillus kunkeei strain 100-1 16S ribosomal RNA gene, partial sequence 99%	JQ009336.1
Crop	KF599129	2010-02-01	H7_11_2M	P7	11	MRS	CO2	ENV1&ENV2	Bacteria	1	Firmicutes	1	Bacilli	1	Lactobacillales	1	Lactobacillaceae	1	Lactobacillus	1	Lactobacillus kunkeei strain 100-1 16S ribosomal RNA gene, partial sequence 99%	JQ009336.1
Crop	KF599130	2010-02-01	H7_4_2M	P7	4	MRS	CO2	ENV1&ENV2	Bacteria	1	Firmicutes	1	Bacilli	1	Lactobacillales	1	Lactobacillaceae	0.99	Lactobacillus	0.99	Lactobacillus sp. Hma2 16S ribosomal RNA gene, partial sequence 98%	EF187240.1
Crop	KF599096	2010-02-01	H2_3_2M	P2	3	MRS	CO2	ENV1&ENV2	Bacteria	1	Firmicutes	1	Bacilli	1	Lactobacillales	1	Lactobacillaceae	1	Lactobacillus	0.57	Lactobacillus sp. Mboho2r2 16S ribosomal RNA gene, partial sequence 98%	HM534813.1
Crop	KF599113	2010-02-01	H6_10_3M	P6	10	MRS	CO2	ENV1&ENV2	Bacteria	1	Firmicutes	1	Bacilli	1	Lactobacillales	1	Lactobacillaceae	1	Lactobacillus	0.62	Uncultured Lactobacillus sp. clone SHOG492 16S ribosomal RNA gene, partial sequence 99%	HM113155.1
Crop	KF599118	2010-02-01	H6_5_1M	P6	5	MRS	CO2	ENV1&ENV2	Bacteria	1	Firmicutes	1	Bacilli	1	Lactobacillales	1	Lactobacillaceae	0.98	Lactobacillus	0.69	Uncultured Lactobacillus sp. clone SHOG492 16S ribosomal RNA gene, partial sequence 99%	HM113155.1
Crop	KF599122	2010-02-01	H6_7_3M	P6	7	MRS	CO2	ENV1&ENV2	Bacteria	1	Firmicutes	1	Bacilli	1	Lactobacillales	1	Lactobacillaceae	1	Lactobacillus	0.62	Uncultured Lactobacillus sp. clone SHOG492 16S ribosomal RNA gene, partial sequence 99%	HM113155.1
Crop	KF599115	2010-02-01	H6_2_3M	P6	2	MRS	CO2	ENV1&ENV2	Bacteria	1	Firmicutes	1	Bacilli	1	Lactobacillales	1	Lactobacillaceae	0.95	Lactobacillus	0.88	Uncultured Lactobacillus sp. clone SHOG533 16S ribosomal RNA gene, partial sequence 98%	HM113181.1
Crop	KF599119	2010-02-01	H6_5_2M	P6	5	MRS	CO2	ENV1&ENV2	Bacteria	1	Firmicutes	1	Bacilli	1	Lactobacillales	1	Lactobacillaceae	0.95	Lactobacillus	0.92	Uncultured Lactobacillus sp. clone SHOG533 16S ribosomal RNA gene, partial sequence 99%	HM113181.1
Crop	KF599120	2010-02-01	H6_5_4M	P6	5	MRS	CO2	ENV1&ENV2	Bacteria	1	Firmicutes	1	Bacilli	1	Lactobacillales	1	Lactobacillaceae	0.93	Lactobacillus	0.84	Uncultured Lactobacillus sp. clone SHOG533 16S ribosomal RNA gene, partial sequence 99%	HM113181.1
Crop	KF599126	2010-02-01	H7_10_1M	P7	10	MRS	O2	ENV1&ENV2	Bacteria	1	Firmicutes	1	Bacilli	1	Lactobacillales	1	Lactobacillaceae	0.99	Lactobacillus	0.56	Uncultured Lactobacillus sp. clone SHOG653 16S ribosomal RNA gene, partial sequence 99%	HM113271.1
Crop	KF599127	2010-02-01	H7_10_2	P7	10	MRS	CO2	ENV1&ENV2	Bacteria	1	Firmicutes	1	Bacilli	1	Lactobacillales	1	Lactobacillaceae	0.99	Lactobacillus	0.98	Uncultured Lactobacillus sp. clone SHOG734 16S ribosomal RNA gene, partial sequence 100%	HM113337.1

## Sheet: MRS 05-01-11
Table S2. Accession numbers and RDP and NCBI classifications for crop culture isolates
Source (Tissue/Pollen)	Accession	Date of Collection	Isolate #	Colony	Alimentary Tract	Media	Cultureing Environment	Primers Used for Sequence	Domain		Phylum		Class		Order		Family		Genus		NCBI Hits and %Identity
Crop	KF599170	2011-05-01	6_2_2	K6	2	MRS	CO2	27F&1522R	Bacteria	1	Actinobacteria	1	Actinobacteria	1	Bifidobacteriales	1	Bifidobacteriaceae	1	Bifidobacterium	1	Bifidobacterium sp. AmmpolR4 16S ribosomal RNA gene, partial sequence 99%	HM534868.1
Crop	KF599147	2011-05-01	2_1_1	K2	1	MRS	CO2	27F&1522R	Bacteria	1	Firmicutes	1	Bacilli	1	Lactobacillales	1	Lactobacillaceae	1	Lactobacillus	1	Lactobacillus kunkeei gene for 16S rRNA, partial sequence, strain IWBT B227 99%	AB559819.1
Crop	KF599160	2011-05-01	3_4_2	K3	4	MRS	CO2	27F&1522R	Bacteria	1	Firmicutes	1	Bacilli	1	Lactobacillales	1	Lactobacillaceae	1	Lactobacillus	1	Lactobacillus kunkeei strain 100-01 16S ribosomal RNA gene, partial sequence 100%	JQ009336.1
Crop	KF599133	2011-05-01	1_1	K1	1	MRS	CO2	27F&1522R	Bacteria	1	Firmicutes	1	Bacilli	1	Lactobacillales	1	Lactobacillaceae	1	Lactobacillus	1	Lactobacillus kunkeei strain 100-1 16S ribosomal RNA gene, partial sequence 100%	JQ009336.1
Crop	KF599134	2011-05-01	1_10_1	K1	10	MRS	CO2	27F&1522R	Bacteria	1	Firmicutes	1	Bacilli	1	Lactobacillales	1	Lactobacillaceae	1	Lactobacillus	1	Lactobacillus kunkeei strain 100-1 16S ribosomal RNA gene, partial sequence 100%	JQ009336.1
Crop	KF599136	2011-05-01	1_11	K1	11	MRS	CO2	27F&1522R	Bacteria	1	Firmicutes	1	Bacilli	1	Lactobacillales	1	Lactobacillaceae	1	Lactobacillus	0.99	Lactobacillus kunkeei strain 100-1 16S ribosomal RNA gene, partial sequence 100%	JQ009336.1
Crop	KF599141	2011-05-01	1_4	K1	4	MRS	CO2	27F&1522R	Bacteria	1	Firmicutes	1	Bacilli	1	Lactobacillales	1	Lactobacillaceae	1	Lactobacillus	1	Lactobacillus kunkeei strain 100-1 16S ribosomal RNA gene, partial sequence 100%	JQ009336.1
Crop	KF599146	2011-05-01	1_8	K1	8	MRS	CO2	27F&1522R	Bacteria	1	Firmicutes	1	Bacilli	1	Lactobacillales	1	Lactobacillaceae	1	Lactobacillus	1	Lactobacillus kunkeei strain 100-1 16S ribosomal RNA gene, partial sequence 100%	JQ009336.1
Crop	KF599148	2011-05-01	2_1_2	K2	1	MRS	O2	27F&1522R	Bacteria	1	Firmicutes	1	Bacilli	1	Lactobacillales	1	Lactobacillaceae	1	Lactobacillus	1	Lactobacillus kunkeei strain 100-1 16S ribosomal RNA gene, partial sequence 100%	JQ009336.1
Crop	KF599151	2011-05-01	2_2	K2	2	MRS	O2	27F&1522R	Bacteria	1	Firmicutes	1	Bacilli	1	Lactobacillales	1	Lactobacillaceae	1	Lactobacillus	1	Lactobacillus kunkeei strain 100-1 16S ribosomal RNA gene, partial sequence 100%	JQ009336.1
Crop	KF599155	2011-05-01	2_4_2	K2	4	MRS	CO2	27F&1522R	Bacteria	1	Firmicutes	1	Bacilli	1	Lactobacillales	1	Lactobacillaceae	1	Lactobacillus	1	Lactobacillus kunkeei strain 100-1 16S ribosomal RNA gene, partial sequence 100%	JQ009336.1
Crop	KF599167	2011-05-01	6_1	K6	1	MRS	O2	27F&1522R	Bacteria	1	Firmicutes	1	Bacilli	1	Lactobacillales	1	Lactobacillaceae	1	Lactobacillus	1	Lactobacillus kunkeei strain 100-1 16S ribosomal RNA gene, partial sequence 100%	JQ009336.1
Crop	KF599163	2011-05-01	6_10_1	K6	10	MRS	CO2	27F&1522R	Bacteria	1	Firmicutes	1	Bacilli	1	Lactobacillales	1	Lactobacillaceae	1	Lactobacillus	1	Lactobacillus kunkeei strain 100-1 16S ribosomal RNA gene, partial sequence 100%	JQ009336.1
Crop	KF599173	2011-05-01	6_4	K6	4	MRS	CO2	27F&1522R	Bacteria	1	Firmicutes	1	Bacilli	1	Lactobacillales	1	Lactobacillaceae	1	Lactobacillus	1	Lactobacillus kunkeei strain 100-1 16S ribosomal RNA gene, partial sequence 100%	JQ009336.1
Crop	KF599174	2011-05-01	6_4	K6	4	MRS	O2	27F&1522R	Bacteria	1	Firmicutes	1	Bacilli	1	Lactobacillales	1	Lactobacillaceae	1	Lactobacillus	1	Lactobacillus kunkeei strain 100-1 16S ribosomal RNA gene, partial sequence 100%	JQ009336.1
Crop	KF599184	2011-05-01	6_8_1	K6	8	MRS	CO2	27F&1522R	Bacteria	1	Firmicutes	1	Bacilli	1	Lactobacillales	1	Lactobacillaceae	1	Lactobacillus	1	Lactobacillus kunkeei strain 100-1 16S ribosomal RNA gene, partial sequence 100%	JQ009336.1
Crop	KF599190	2011-05-01	7_11_2	K7	11	MRS	O2	27F&1522R	Bacteria	1	Firmicutes	1	Bacilli	1	Lactobacillales	1	Lactobacillaceae	1	Lactobacillus	1	Lactobacillus kunkeei strain 100-1 16S ribosomal RNA gene, partial sequence 100%	JQ009336.1
Crop	KF599192	2011-05-01	7_3	K7	3	MRS	CO2	27F&1522R	Bacteria	1	Firmicutes	1	Bacilli	1	Lactobacillales	1	Lactobacillaceae	1	Lactobacillus	1	Lactobacillus kunkeei strain 100-1 16S ribosomal RNA gene, partial sequence 100%	JQ009336.1
Crop	KF599195	2011-05-01	7_5	K7	5	MRS	CO2	27F&1522R	Bacteria	1	Firmicutes	1	Bacilli	1	Lactobacillales	1	Lactobacillaceae	1	Lactobacillus	1	Lactobacillus kunkeei strain 100-1 16S ribosomal RNA gene, partial sequence 100%	JQ009336.1
Crop	KF599139	2011-05-01	1_2	K1	2	MRS	O2	27F&1522R	Bacteria	1	Firmicutes	1	Bacilli	1	Lactobacillales	1	Lactobacillaceae	1	Lactobacillus	1	Lactobacillus kunkeei strain 100-1 16S ribosomal RNA gene, partial sequence 99%	JQ009336.1
Crop	KF599142	2011-05-01	1_4	K1	4	MRS	O2	27F&1522R	Bacteria	1	Firmicutes	1	Bacilli	1	Lactobacillales	1	Lactobacillaceae	1	Lactobacillus	1	Lactobacillus kunkeei strain 100-1 16S ribosomal RNA gene, partial sequence 99%	JQ009336.1
Crop	KF599144	2011-05-01	1_5_2	K1	5	MRS	CO2	27F&1522R	Bacteria	1	Firmicutes	1	Bacilli	1	Lactobacillales	1	Lactobacillaceae	1	Lactobacillus	1	Lactobacillus kunkeei strain 100-1 16S ribosomal RNA gene, partial sequence 99%	JQ009336.1
Crop	KF599145	2011-05-01	1_6	K1	6	MRS	CO2	27F&1522R	Bacteria	1	Firmicutes	1	Bacilli	1	Lactobacillales	1	Lactobacillaceae	1	Lactobacillus	1	Lactobacillus kunkeei strain 100-1 16S ribosomal RNA gene, partial sequence 99%	JQ009336.1
Crop	KF599149	2011-05-01	2_2_1	K2	2	MRS	CO2	27F&1522R	Bacteria	1	Firmicutes	1	Bacilli	1	Lactobacillales	1	Lactobacillaceae	1	Lactobacillus	1	Lactobacillus kunkeei strain 100-1 16S ribosomal RNA gene, partial sequence 99%	JQ009336.1
Crop	KF599152	2011-05-01	2_3_1	K2	3	MRS	CO2	27F&1522R	Bacteria	1	Firmicutes	1	Bacilli	1	Lactobacillales	1	Lactobacillaceae	1	Lactobacillus	1	Lactobacillus kunkeei strain 100-1 16S ribosomal RNA gene, partial sequence 99%	JQ009336.1
Crop	KF599162	2011-05-01	6_1	K6	1	MRS	CO2	27F&1522R	Bacteria	1	Firmicutes	1	Bacilli	1	Lactobacillales	1	Lactobacillaceae	1	Lactobacillus	1	Lactobacillus kunkeei strain 100-1 16S ribosomal RNA gene, partial sequence 99%	JQ009336.1
Crop	KF599182	2011-05-01	6_7_1	K6	7	MRS	CO2	27F&1522R	Bacteria	1	Firmicutes	1	Bacilli	1	Lactobacillales	1	Lactobacillaceae	1	Lactobacillus	1	Lactobacillus kunkeei strain 100-1 16S ribosomal RNA gene, partial sequence 99%	JQ009336.1
Crop	KF599138	2011-05-01	1_2	K1	2	MRS	CO2	27F&1522R	Bacteria	1	Firmicutes	1	Bacilli	1	Lactobacillales	1	Lactobacillaceae	1	Lactobacillus	1	Lactobacillus kunkeei strain 100-20 16S ribosomal RNA gene, partial sequence 100%	JQ009337.1
Crop	KF599137	2011-05-01	1_1	K1	1	MRS	O2	27F&1522R	Bacteria	1	Firmicutes	1	Bacilli	1	Lactobacillales	1	Lactobacillaceae	1	Lactobacillus	1	Lactobacillus kunkeei strain 100-20 16S ribosomal RNA gene, partial sequence 99%	JQ009337.1
Crop	KF599140	2011-05-01	1_3	K1	3	MRS	O2	27F&1522R	Bacteria	1	Firmicutes	1	Bacilli	1	Lactobacillales	1	Lactobacillaceae	1	Lactobacillus	1	Lactobacillus kunkeei strain 100-20 16S ribosomal RNA gene, partial sequence 99%	JQ009337.1
Crop	KF599164	2011-05-01	6_10_2	K6	10	MRS	CO2	27F&1522R	Bacteria	1	Firmicutes	1	Bacilli	1	Lactobacillales	1	Lactobacillaceae	1	Lactobacillus	0.99	Lactobacillus kunkeei strain 100-20 16S ribosomal RNA gene, partial sequence 99%	JQ009337.1
Crop	KF599189	2011-05-01	7_11_1	K7	11	MRS	O2	27F&1522R	Bacteria	1	Firmicutes	1	Bacilli	1	Lactobacillales	1	Lactobacillaceae	1	Lactobacillus	1	Lactobacillus kunkeei strain 100-20 16S ribosomal RNA gene, partial sequence 99%	JQ009337.1
Crop	KF599157	2011-05-01	2_5_2	K2	5	MRS	CO2	27F&1522R	Bacteria	1	Firmicutes	1	Bacilli	1	Lactobacillales	1	Lactobacillaceae	0.97	Lactobacillus	0.87	Lactobacillus kunkeei strain 103-10 16S ribosomal RNA gene, partial sequence 99%	JQ009347.1
Crop	KF599161	2011-05-01	3_5_2	K3	5	MRS	CO2	27F&1522R	Bacteria	1	Firmicutes	1	Bacilli	1	Lactobacillales	1	Lactobacillaceae	1	Lactobacillus	1	Lactobacillus kunkeei strain 103-10 16S ribosomal RNA gene, partial sequence 99%	JQ009347.1
Crop	KF599143	2011-05-01	1_5_1	K1	5	MRS	CO2	27F&1522R	Bacteria	1	Firmicutes	1	Bacilli	1	Lactobacillales	1	Lactobacillaceae	0.99	Lactobacillus	0.98	Lactobacillus kunkeei strain 93-30 16S ribosomal RNA gene, partial sequence 100%	JQ009345.1
Crop	KF599159	2011-05-01	3_3_1	K3	3	MRS	CO2	27F&1522R	Bacteria	1	Firmicutes	1	Bacilli	1	Lactobacillales	1	Lactobacillaceae	0.98	Lactobacillus	0.86	Lactobacillus kunkeei strain B6-1 16S ribosomal RNA gene, partial sequence 99%	JQ009353.1
Crop	KF599135	2011-05-01	1_10_2	K1	10	MRS	CO2	27F&1522R	Bacteria	1	Firmicutes	1	Bacilli	1	Lactobacillales	1	Lactobacillaceae	1	Lactobacillus	1	Lactobacillus kunkeei strain C1-20 16S ribosomal RNA gene, partial sequence 100%	JQ009351.1
Crop	KF599150	2011-05-01	2_2_2	K2	2	MRS	CO2	27F&1522R	Bacteria	1	Firmicutes	1	Bacilli	1	Lactobacillales	1	Lactobacillaceae	1	Lactobacillus	1	Lactobacillus kunkeei strain C1-20 16S ribosomal RNA gene, partial sequence 100%	JQ009351.1
Crop	KF599156	2011-05-01	2_5_1	K2	5	MRS	CO2	27F&1522R	Bacteria	1	Firmicutes	1	Bacilli	1	Lactobacillales	1	Lactobacillaceae	1	Lactobacillus	1	Lactobacillus kunkeei strain C1-20 16S ribosomal RNA gene, partial sequence 100%	JQ009351.1
Crop	KF599158	2011-05-01	2_5_3	K2	5	MRS	CO2	27F&1522R	Bacteria	1	Firmicutes	1	Bacilli	1	Lactobacillales	1	Lactobacillaceae	1	Lactobacillus	0.99	Lactobacillus kunkeei strain C1-20 16S ribosomal RNA gene, partial sequence 99%	JQ009351.1
Crop	KF599188	2011-05-01	7_10_2	K7	10	MRS	CO2	27F&1522R	Bacteria	1	Firmicutes	1	Bacilli	1	Lactobacillales	1	Lactobacillaceae	1	Lactobacillus	1	Lactobacillus sp. Afpoto7 16S ribosomal RNA gene, partial sequence 99%	HM534804.1
Crop	KF599193	2011-05-01	7_4_1	K7	4	MRS	CO2	27F&1522R	Bacteria	1	Firmicutes	1	Bacilli	1	Lactobacillales	1	Lactobacillaceae	1	Lactobacillus	1	Lactobacillus sp. Afpoto7 16S ribosomal RNA gene, partial sequence 99%	HM534804.1
Crop	KF599178	2011-05-01	6_5_3	K6	5	MRS	CO2	27F&1522R	Bacteria	1	Firmicutes	1	Bacilli	1	Lactobacillales	1	Lactobacillaceae	1	Lactobacillus	0.96	Lactobacillus sp. AmmhmT7 16S ribosomal RNA gene, partial sequence 100%	HM534866.1
Crop	KF599166	2011-05-01	6_10_4	K6	10	MRS	CO2	27F&1522R	Bacteria	1	Firmicutes	1	Bacilli	1	Lactobacillales	1	Lactobacillaceae	1	Lactobacillus	0.99	Lactobacillus sp. Biut2 16S ribosomal RNA gene, partial sequence 99%	EF187241.1
Crop	KF599175	2011-05-01	6_5_1	K6	5	MRS	CO2	27F&1522R	Bacteria	1	Firmicutes	1	Bacilli	1	Lactobacillales	1	Lactobacillaceae	1	Lactobacillus	0.99	Lactobacillus sp. Biut2 16S ribosomal RNA gene, partial sequence 99%	EF187241.1
Crop	KF599153	2011-05-01	2_3_2	2K	3	MRS	CO2	27F&1522R	Bacteria	1	Firmicutes	1	Bacilli	1	Lactobacillales	0.99	Lactobacillaceae	0.94	Lactobacillus	0.59	Lactobacillus sp. Mboho2r2 16S ribosomal RNA gene, partial sequence 99%	HM534813.1
Crop	KF599165	2011-05-01	6_10_3	K6	10	MRS	CO2	27F&1522R	Bacteria	1	Firmicutes	1	Bacilli	1	Lactobacillales	1	Lactobacillaceae	0.99	Lactobacillus	0.91	Lactobacillus sp. Mboho2r2 16S ribosomal RNA gene, partial sequence 99%	HM534813.1
Crop	KF599168	2011-05-01	6_2_1	K6	2	MRS	CO2	27F&1522R	Bacteria	1	Firmicutes	1	Bacilli	1	Lactobacillales	1	Lactobacillaceae	1	Lactobacillus	0.87	Lactobacillus sp. Mboho2r2 16S ribosomal RNA gene, partial sequence 99%	HM534813.1
Crop	KF599176	2011-05-01	6_5_1	K6	5	MRS	O2	27F&1522R	Bacteria	1	Firmicutes	1	Bacilli	1	Lactobacillales	1	Lactobacillaceae	0.99	Lactobacillus	0.69	Lactobacillus sp. Mboho2r2 16S ribosomal RNA gene, partial sequence 99%	HM534813.1
Crop	KF599183	2011-05-01	6_7_3	K6	7	MRS	CO2	27F&1522R	Bacteria	1	Firmicutes	1	Bacilli	1	Lactobacillales	1	Lactobacillaceae	1	Lactobacillus	0.87	Lactobacillus sp. Mboho2r2 16S ribosomal RNA gene, partial sequence 99%	HM534813.1
Crop	KF599187	2011-05-01	7_10_1	K7	10	MRS	O2	27F&1522R	Bacteria	1	Firmicutes	1	Bacilli	1	Lactobacillales	1	Lactobacillaceae	0.98	Lactobacillus	0.79	Lactobacillus sp. Mboho2r2 16S ribosomal RNA gene, partial sequence 99%	HM534813.1
Crop	KF599194	2011-05-01	7_4_2	K7	4	MRS	CO2	27F&1522R	Bacteria	1	Firmicutes	1	Bacilli	1	Lactobacillales	0.99	Lactobacillaceae	0.88	Lactobacillus	0.86	Lactobacillus sp. Mboho2r2 16S ribosomal RNA gene, partial sequence 99%	HM534813.1
Crop	KF599196	2011-05-01	7_9	K7	9	MRS	CO2	27F&1522R	Bacteria	1	Firmicutes	1	Bacilli	1	Lactobacillales	1	Lactobacillaceae	1	Lactobacillus	0.93	Lactobacillus sp. Mboho2r2 16S ribosomal RNA gene, partial sequence 99%	HM534813.1
Crop	KF599191	2011-05-01	7_2_2	K7	2	MRS	CO2	27F&1522R	Bacteria	1	Firmicutes	1	Bacilli	1	Lactobacillales	1	Lactobacillaceae	0.99	Lactobacillus	0.99	Lactobacillus sp. Mbohs2t7 16S ribosomal RNA gene, partial sequence 99%	HM534798.1
Crop	KF599171	2011-05-01	6_2_2_2	K6	2	MRS	CO2	27F&1522R	Bacteria	1	Firmicutes	1	Bacilli	1	Lactobacillales	1	Lactobacillaceae	0.98	Lactobacillus	0.98	Lactobacillus sp. Mbopo2r2 16S ribosomal RNA gene, partial sequence 99%	HM534803.1
Crop	KF599154	2011-05-01	2_3_3	2K	3	MRS	CO2	27F&1522R	Bacteria	1	Firmicutes	1	Bacilli	1	Lactobacillales	1	Lactobacillaceae	0.97	Lactobacillus	0.97	Lactobacillus sp. Sal8 16S ribosomal RNA gene, partial sequence 100%	HQ842700.1
Crop	KF599169	2011-05-01	6_2_1_2	K6	2	MRS	CO2	27F&1522R	Bacteria	1	Firmicutes	1	Bacilli	1	Lactobacillales	1	Lactobacillaceae	0.99	Lactobacillus	0.98	Lactobacillus sp. Sal8 16S ribosomal RNA gene, partial sequence 99%	HQ842700.1
Crop	KF599179	2011-05-01	6_6_1	K6	6	MRS	O2	27F&1522R	Bacteria	1	Proteobacteria	1	Alphaproteobacteria	1	Rhodospirillales	1	Acetobacteraceae	1	Saccharibacter	0.77	Uncultured Acetobacteraceae bacterium clone SHAJ056 16S ribosomal RNA gene, partial sequence 99%	HM108486.1
Crop	KF599186	2011-05-01	7_10_1	K7	10	MRS	CO2	27F&1522R	Bacteria	1	Actinobacteria	1	Actinobacteria	1	Bifidobacteriales	1	Bifidobacteriaceae	1	Bifidobacterium	1	Uncultured Bifidobacterium sp. clone SHOG414 16S ribosomal RNA gene, partial sequence 99%	HM113111.1
Crop	KF599172	2011-05-01	6_2_3	K6	2	MRS	CO2	27F&1522R	Bacteria	1	Firmicutes	1	Bacilli	1	Lactobacillales	1	Lactobacillaceae	0.99	Lactobacillus	0.99	Uncultured Lactobacillus sp. clone pAJ197 16S ribosomal RNA gene, partial sequence 99%	AY370183.1
Crop	KF599177	2011-05-01	6_5_2	K6	5	MRS	CO2	27F&1522R	Bacteria	1	Firmicutes	1	Bacilli	1	Lactobacillales	1	Lactobacillaceae	0.99	Lactobacillus	0.98	Uncultured Lactobacillus sp. clone pAJ197 16S ribosomal RNA gene, partial sequence 99%	AY370183.1
Crop	KF599180	2011-05-01	6_6_3	K6	6	MRS	CO2	27F&1522R	Bacteria	1	Firmicutes	1	Bacilli	1	Lactobacillales	1	Lactobacillaceae	0.99	Lactobacillus	0.99	Uncultured Lactobacillus sp. clone pAJ197 16S ribosomal RNA gene, partial sequence 99%	AY370183.1
Crop	KF599181	2011-05-01	6_6_4	K6	6	MRS	CO2	27F&1522R	Bacteria	1	Firmicutes	1	Bacilli	1	Lactobacillales	1	Lactobacillaceae	0.98	Lactobacillus	0.98	Uncultured Lactobacillus sp. clone pAJ197 16S ribosomal RNA gene, partial sequence 99%	AY370183.1
Crop	KF599185	2011-05-01	6_9_2	K6	9	MRS	CO2	27F&1522R	Bacteria	1	Firmicutes	1	Bacilli	1	Lactobacillales	1	Lactobacillaceae	1	Lactobacillus	1	Uncultured Lactobacillus sp. clone pAJ197 16S ribosomal RNA gene, partial sequence 99%	AY370183.1
Crop	KF599197	2011-05-01	7_9	K7	9	MRS	O2	27F&1522R	Bacteria	1	Firmicutes	1	Bacilli	1	Lactobacillales	1	Lactobacillaceae	1	Lactobacillus	1	Uncultured Lactobacillus sp. clone pAJ197 16S ribosomal RNA gene, partial sequence 99%	AY370183.1

## Sheet: MRS 07-01-11
Table S2. Accession numbers and RDP and NCBI classifications for crop culture isolates
Source (Tissue/Pollen)	Accession	Date of Collection	Isolate #	Colony	Alimentary Tract	Media	Cultureing Environment	Primers Used for Sequence	Domain		Phylum		Class		Order		Family		Genus		NCBI Hits and %Identity
Crop	KF599198	2011-07-01	H2_10_1M	K2	10	MRS	O2	27F & 1522R	Bacteria	1	Firmicutes	1	Bacilli	1	Lactobacillales	1	Leuconostocaceae	1	Fructobacillus	1	Fructobacillus fructosus gene for 16S rRNA, partial sequence, strain NBRC 3516 99%	AB680098.1
Crop	KF599210	2011-07-01	H2_4_3M	K2	4	MRS	CO2	27F & 1522R	Bacteria	1	Firmicutes	1	Bacilli	1	Lactobacillales	1	Leuconostocaceae	1	Fructobacillus	1	Fructobacillus fructosus gene for 16S rRNA, partial sequence, strain NBRC 3516 99%	AB680098.1
Crop	KF599216	2011-07-01	H2_7_2M	K2	7	MRS	CO2	27F & 1522R	Bacteria	1	Firmicutes	1	Bacilli	1	Lactobacillales	1	Leuconostocaceae	1	Fructobacillus	1	Fructobacillus fructosus gene for 16S rRNA, partial sequence, strain NBRC 3516 99%	AB680098.1
Crop	KF599232	2011-07-01	H8_10_1M	K8	10	MRS	O2	27F & 1522R	Bacteria	1	Firmicutes	1	Bacilli	1	Lactobacillales	1	Leuconostocaceae	1	Fructobacillus	1	Fructobacillus fructosus gene for 16S rRNA, partial sequence, strain NBRC 3516 99%	AB680098.1
Crop	KF599238	2011-07-01	H8_12_3M	K8	12	MRS	CO2	27F & 1522R	Bacteria	1	Firmicutes	1	Bacilli	1	Lactobacillales	1	Leuconostocaceae	1	Fructobacillus	1	Fructobacillus fructosus gene for 16S rRNA, partial sequence, strain NBRC 3516 99%	AB680098.1
Crop	KF599240	2011-07-01	H8_12_6M	K8	12	MRS	O2	27F & 1522R	Bacteria	1	Firmicutes	1	Bacilli	1	Lactobacillales	1	Leuconostocaceae	1	Fructobacillus	1	Fructobacillus fructosus gene for 16S rRNA, partial sequence, strain NBRC 3516 99%	AB680098.1
Crop	KF599244	2011-07-01	H8_6_1M	K8	6	MRS	CO2	27F & 1522R	Bacteria	1	Firmicutes	1	Bacilli	1	Lactobacillales	1	Leuconostocaceae	1	Fructobacillus	1	Fructobacillus fructosus gene for 16S rRNA, partial sequence, strain NBRC 3516 99%	AB680098.1
Crop	KF599252	2011-07-01	H8_8_2M	K8	8	MRS	CO2	27F & 1522R	Bacteria	1	Firmicutes	1	Bacilli	1	Lactobacillales	1	Leuconostocaceae	1	Fructobacillus	1	Fructobacillus fructosus gene for 16S rRNA, partial sequence, strain NBRC 3516 99%	AB680098.1
Crop	KF599257	2011-07-01	H8_9_4M	K8	9	MRS	CO2	27F & 1522R	Bacteria	1	Firmicutes	1	Bacilli	1	Lactobacillales	1	Leuconostocaceae	1	Fructobacillus	1	Fructobacillus fructosus gene for 16S rRNA, partial sequence, strain NBRC 3516 99%	NR_042285.1
Crop	KF599199	2011-07-01	H2_10_2M	K2	10	MRS	O2	27F & 1522R	Bacteria	1	Firmicutes	1	Bacilli	1	Lactobacillales	1	Lactobacillaceae	1	Lactobacillus	1	Lactobacillus kunkeei strain 100-1 16S ribosomal RNA gene, partial sequence 99%	JQ009336.1
Crop	KF599221	2011-07-01	H7_11_2M	K7	11	MRS	CO2	27F & 1522R	Bacteria	1	Firmicutes	1	Bacilli	1	Lactobacillales	1	Lactobacillaceae	1	Lactobacillus	0.98	Lactobacillus sp. Mboho2r2 16S ribosomal RNA gene, partial sequence 99%	HM534813.1
Crop	KF599223	2011-07-01	H7_11_4M	K7	11	MRS	CO2	27F & 1522R	Bacteria	1	Firmicutes	1	Bacilli	1	Lactobacillales	1	Lactobacillaceae	1	Lactobacillus	0.98	Lactobacillus sp. Mboho2r2 16S ribosomal RNA gene, partial sequence 99%	HM534813.1
Crop	KF599203	2011-07-01	H2_1_4M	K2	1	MRS	O2	27F & 1522R	Bacteria	1	Proteobacteria	1	Alphaproteobacteria	1	Rhodospirillales	1	Acetobacteraceae	1	SacHaribacter	0.85	Uncultured alpha proteobacterium partial 16S rRNA gene, isolate Am 11 99%	AJ971850.1
Crop	KF599212	2011-07-01	H2_5_1M	K2	5	MRS	O2	27F & 1522R	Bacteria	1	Proteobacteria	1	Alphaproteobacteria	1	Rhodospirillales	1	Acetobacteraceae	1	SacHaribacter	0.85	Uncultured alpha proteobacterium partial 16S rRNA gene, isolate Am 11 99%	AJ971850.1
Crop	KF599213	2011-07-01	H2_6_1M	K2	6	MRS	O2	27F & 1522R	Bacteria	1	Proteobacteria	1	Alphaproteobacteria	1	Rhodospirillales	1	Acetobacteraceae	1	SacHaribacter	0.78	Uncultured alpha proteobacterium partial 16S rRNA gene, isolate Am 11 99%	AJ971850.1
Crop	KF599202	2011-07-01	H2_1_2M	K2	1	MRS	O2	27F & 1522R	Bacteria	1	Proteobacteria	1	Alphaproteobacteria	1	Rhodospirillales	1	Acetobacteraceae	1	SacHaribacter	0.85	Uncultured alpha proteobacterium partial 16S rRNA gene, isolate Am 11 99%	AJ971850.1
Crop	KF599214	2011-07-01	H2_6_2M	K2	6	MRS	CO2	27F & 1522R	Bacteria	1	Firmicutes	1	Bacilli	1	Lactobacillales	1	Leuconostocaceae	1	Fructobacillus	0.58	Uncultured Bacilli bacterium clone SHOC709 16S ribosomal RNA gene, partial sequence 99%	HM112739.1
Crop	KF599209	2011-07-01	H2_4_21M	K2	4	MRS	CO2	27F & 1522R	Bacteria	1	Firmicutes	1	Bacilli	1	Lactobacillales	1	Leuconostocaceae	1	Fructobacillus	1	Fructobacillus durionis strain LMG 22556 = LAB 1679 16S ribosomal RNA, complete sequence	NR_042285.1
Crop	KF599204	2011-07-01	H2_2_1M	K2	2	MRS	CO2	27F & 1522R	Bacteria	1	Firmicutes	1	Bacilli	1	Lactobacillales	1	Leuconostocaceae	1	Fructobacillus	1	Fructobacillus fructosus gene for 16S rRNA, partial sequence, strain NBRC 3516 99%	AB680098.1
Crop	KF599205	2011-07-01	H2_2_3M	K2	2	MRS	CO2	27F & 1522R	Bacteria	1	Firmicutes	1	Bacilli	1	Lactobacillales	1	Leuconostocaceae	1	Fructobacillus	1	Fructobacillus fructosus gene for 16S rRNA, partial sequence, strain NBRC 3516 99%	AB680098.1
Crop	KF599208	2011-07-01	H2_4_1M	K2	4	MRS	CO2	27F & 1522R	Bacteria	1	Firmicutes	1	Bacilli	1	Lactobacillales	1	Leuconostocaceae	1	Fructobacillus	1	Fructobacillus fructosus gene for 16S rRNA, partial sequence, strain NBRC 3516 99%	AB680098.1
Crop	KF599211	2011-07-01	H2_4_4M	K2	4	MRS	CO2	27F & 1522R	Bacteria	1	Firmicutes	1	Bacilli	1	Lactobacillales	1	Leuconostocaceae	1	Fructobacillus	1	Fructobacillus fructosus gene for 16S rRNA, partial sequence, strain NBRC 3516 99%	AB680098.1
Crop	KF599219	2011-07-01	H2_9_3M	K2	9	MRS	CO2	27F & 1522R	Bacteria	1	Firmicutes	1	Bacilli	1	Lactobacillales	1	Leuconostocaceae	1	Fructobacillus	1	Fructobacillus fructosus gene for 16S rRNA, partial sequence, strain NBRC 3516 99%	AB680098.1
Crop	KF599233	2011-07-01	H8_10_3M	K8	10	MRS	CO2	27F & 1522R	Bacteria	1	Firmicutes	1	Bacilli	1	Lactobacillales	1	Leuconostocaceae	1	Fructobacillus	1	Fructobacillus fructosus gene for 16S rRNA, partial sequence, strain NBRC 3516 99%	AB680098.1
Crop	KF599234	2011-07-01	H8_11_1M	K8	11	MRS	CO2	27F & 1522R	Bacteria	1	Firmicutes	1	Bacilli	1	Lactobacillales	1	Leuconostocaceae	1	Fructobacillus	1	Fructobacillus fructosus gene for 16S rRNA, partial sequence, strain NBRC 3516 99%	AB680098.1
Crop	KF599235	2011-07-01	H8_11_2M	K8	11	MRS	CO2	27F & 1522R	Bacteria	1	Firmicutes	1	Bacilli	1	Lactobacillales	1	Leuconostocaceae	1	Fructobacillus	1	Fructobacillus fructosus gene for 16S rRNA, partial sequence, strain NBRC 3516 99%	AB680098.1
Crop	KF599237	2011-07-01	H8_11_4M	K8	11	MRS	CO2	27F & 1522R	Bacteria	1	Firmicutes	1	Bacilli	1	Lactobacillales	1	Leuconostocaceae	1	Fructobacillus	1	Fructobacillus fructosus gene for 16S rRNA, partial sequence, strain NBRC 3516 99%	AB680098.1
Crop	KF599246	2011-07-01	H8_6_4M	K8	6	MRS	CO2	27F & 1522R	Bacteria	1	Firmicutes	1	Bacilli	1	Lactobacillales	1	Leuconostocaceae	1	Fructobacillus	1	Fructobacillus fructosus gene for 16S rRNA, partial sequence, strain NBRC 3516 99%	AB680098.1
Crop	KF599248	2011-07-01	H8_7_2M	K8	7	MRS	CO2	27F & 1522R	Bacteria	1	Firmicutes	1	Bacilli	1	Lactobacillales	1	Leuconostocaceae	1	Fructobacillus	1	Fructobacillus fructosus gene for 16S rRNA, partial sequence, strain NBRC 3516 99%	AB680098.1
Crop	KF599249	2011-07-01	H8_7_3M	K8	7	MRS	CO2	27F & 1522R	Bacteria	1	Firmicutes	1	Bacilli	1	Lactobacillales	1	Leuconostocaceae	1	Fructobacillus	1	Fructobacillus fructosus gene for 16S rRNA, partial sequence, strain NBRC 3516 99%	AB680098.1
Crop	KF599253	2011-07-01	H8_8_3M	K8	8	MRS	CO2	27F & 1522R	Bacteria	1	Firmicutes	1	Bacilli	1	Lactobacillales	1	Leuconostocaceae	1	Fructobacillus	1	Fructobacillus fructosus gene for 16S rRNA, partial sequence, strain NBRC 3516 99%	AB680098.1
Crop	KF599255	2011-07-01	H8_9_1M	K8	9	MRS	CO2	27F & 1522R	Bacteria	1	Firmicutes	1	Bacilli	1	Lactobacillales	1	Leuconostocaceae	1	Fructobacillus	1	Fructobacillus fructosus gene for 16S rRNA, partial sequence, strain NBRC 3516 99%	AB680098.1
Crop	KF599217	2011-07-01	H2_7_3M	K2	7	MRS	CO2	27F & 1522R	Bacteria	1	Firmicutes	1	Bacilli	1	Lactobacillales	1	Leuconostocaceae	1	Fructobacillus	1	Fructobacillus pseudoficulneus strain LC51 16S ribosomal RNA, partial sequence	AY169967.1
Crop	KF599200	2011-07-01	H2_10_3M	K2	10	MRS	O2	27F & 1522R	Bacteria	1	Firmicutes	1	Bacilli	1	Lactobacillales	1	Lactobacillaceae	1	Lactobacillus	1	Lactobacillus kunkeei strain 100-1 16S ribosomal RNA gene, partial sequence 99%	JQ009336.1
Crop	KF599201	2011-07-01	H2_10_4M	K2	10	MRS	O2	27F & 1522R	Bacteria	1	Firmicutes	1	Bacilli	1	Lactobacillales	1	Lactobacillaceae	1	Lactobacillus	1	Lactobacillus kunkeei strain 100-1 16S ribosomal RNA gene, partial sequence 99%	JQ009336.1
Crop	KF599206	2011-07-01	H2_2_6M	K2	2	MRS	CO2	27F & 1522R	Bacteria	1	Firmicutes	1	Bacilli	1	Lactobacillales	1	Lactobacillaceae	1	Lactobacillus	1	Lactobacillus kunkeei strain 100-1 16S ribosomal RNA gene, partial sequence 99%	JQ009336.1
Crop	KF599207	2011-07-01	H2_3_1M	K2	3	MRS	CO2	27F & 1522R	Bacteria	1	Firmicutes	1	Bacilli	1	Lactobacillales	1	Lactobacillaceae	1	Lactobacillus	1	Lactobacillus kunkeei strain 100-1 16S ribosomal RNA gene, partial sequence 99%	JQ009336.1
Crop	KF599218	2011-07-01	H2_7_4M	K2	7	MRS	CO2	27F & 1522R	Bacteria	1	Firmicutes	1	Bacilli	1	Lactobacillales	1	Lactobacillaceae	1	Lactobacillus	1	Lactobacillus kunkeei strain 100-1 16S ribosomal RNA gene, partial sequence 99%	JQ009336.1
Crop	KF599245	2011-07-01	H8_6_2M	K8	6	MRS	O2	27F & 1522R	Bacteria	1	Firmicutes	1	Bacilli	1	Lactobacillales	1	Lactobacillaceae	1	Lactobacillus	1	Lactobacillus kunkeei strain 100-1 16S ribosomal RNA gene, partial sequence 99%	JQ009336.1
Crop	KF599251	2011-07-01	H8_8_1M	K8	8	MRS	O2	27F & 1522R	Bacteria	1	Firmicutes	1	Bacilli	1	Lactobacillales	1	Lactobacillaceae	1	Lactobacillus	1	Lactobacillus kunkeei strain 100-1 16S ribosomal RNA gene, partial sequence 99%	JQ009336.1
Crop	KF599254	2011-07-01	H8_8_4M	K8	8	MRS	O2	27F & 1522R	Bacteria	1	Firmicutes	1	Bacilli	1	Lactobacillales	1	Lactobacillaceae	1	Lactobacillus	1	Lactobacillus kunkeei strain 100-1 16S ribosomal RNA gene, partial sequence 99%	JQ009336.1
Crop	KF599256	2011-07-01	H8_9_3M	K8	9	MRS	O2	27F & 1522R	Bacteria	1	Firmicutes	1	Bacilli	1	Lactobacillales	1	Lactobacillaceae	1	Lactobacillus	1	Lactobacillus kunkeei strain 100-1 16S ribosomal RNA gene, partial sequence 99%	JQ009336.1
Crop	KF599259	2011-07-01	H8_9_6M	K8	9	MRS	O2	27F & 1522R	Bacteria	1	Firmicutes	1	Bacilli	1	Lactobacillales	1	Lactobacillaceae	1	Lactobacillus	1	Lactobacillus kunkeei strain 100-1 16S ribosomal RNA gene, partial sequence 99%	JQ009336.1
Crop	KF599215	2011-07-01	H2_7_1M	K2	7	MRS	O2	27F & 1522R	Bacteria	1	Firmicutes	1	Bacilli	1	Lactobacillales	1	Lactobacillaceae	1	Lactobacillus	1	Lactobacillus kunkeei strain 100-20 16S ribosomal RNA gene, partial sequence 100%	JQ009337.1
Crop	KF599247	2011-07-01	H8_7_1M	K8	7	MRS	O2	27F & 1522R	Bacteria	1	Firmicutes	1	Bacilli	1	Lactobacillales	1	Lactobacillaceae	1	Lactobacillus	1	Lactobacillus kunkeei strain 80-30 16S ribosomal RNA gene, partial sequence 99%	JQ009337.1
Crop	KF599225	2011-07-01	H7_1_2M	K7	1	MRS	O2	27F & 1522R	Bacteria	1	Firmicutes	1	Bacilli	1	Lactobacillales	1	Lactobacillaceae	1	Lactobacillus	0.93	Lactobacillus sp. Afpoto14 16S ribosomal RNA gene, partial sequence 99%	HM534811.1
Crop	KF599236	2011-07-01	H8_11_3M	K8	11	MRS	O2	27F & 1522R	Bacteria	1	Firmicutes	1	Bacilli	1	Lactobacillales	1	Lactobacillaceae	1	Lactobacillus	1	Lactobacillus sp. fhon13 16S ribosomal RNA gene, partial sequence 99%	HM534758.1
Crop	KF599250	2011-07-01	H8_7_4M	K8	7	MRS	CO2	27F & 1522R	Bacteria	1	Firmicutes	1	Bacilli	1	Lactobacillales	1	Lactobacillaceae	1	Lactobacillus	1	Lactobacillus sp. fhon13 16S ribosomal RNA gene, partial sequence 99%	HM534758.1
Crop	KF599258	2011-07-01	H8_9_5M	K8	9	MRS	CO2	27F & 1522R	Bacteria	1	Firmicutes	1	Bacilli	1	Lactobacillales	1	Lactobacillaceae	0.98	Lactobacillus	0.97	Lactobacillus sp. Mbobb2r6 16S ribosomal RNA gene, partial sequence 99%	HM534802.1
Crop	KF599222	2011-07-01	H7_11_3M	K7	11	MRS	O2	27F & 1522R	Bacteria	1	Firmicutes	1	Bacilli	1	Lactobacillales	1	Lactobacillaceae	1	Lactobacillus	0.92	Lactobacillus sp. Mboho2r2 16S ribosomal RNA gene, partial sequence 99%	HM534813.1
Crop	KF599229	2011-07-01	H7_6_4M	K7	6	MRS	CO2	27F & 1522R	Bacteria	1	Firmicutes	1	Bacilli	1	Lactobacillales	1	Lactobacillaceae	1	Lactobacillus	0.92	Lactobacillus sp. Mboho2r2 16S ribosomal RNA gene, partial sequence 99%	HM534813.1
Crop	KF599231	2011-07-01	H7_7_1M	K7	7	MRS	CO2	27F & 1522R	Bacteria	1	Firmicutes	1	Bacilli	1	Lactobacillales	1	Lactobacillaceae	1	Lactobacillus	0.93	Lactobacillus sp. Mboho2r2 16S ribosomal RNA gene, partial sequence 99%	HM534813.1
Crop	KF599242	2011-07-01	H8_5_3M	K8	5	MRS	CO2	27F & 1522R	Bacteria	1	Firmicutes	1	Bacilli	1	Lactobacillales	1	Lactobacillaceae	1	Lactobacillus	0.98	Lactobacillus sp. Mboho2r2 16S ribosomal RNA gene, partial sequence 99%	HM534813.1
Crop	KF599243	2011-07-01	H8_5_4M	K8	5	MRS	CO2	27F & 1522R	Bacteria	1	Firmicutes	1	Bacilli	1	Lactobacillales	1	Lactobacillaceae	1	Lactobacillus	0.98	Lactobacillus sp. Mboho2r2 16S ribosomal RNA gene, partial sequence 99%	HM534813.1
Crop	KF599220	2011-07-01	H7_11_1M	K7	11	MRS	O2	27F & 1522R	Bacteria	1	Firmicutes	1	Bacilli	1	Lactobacillales	1	Lactobacillaceae	0.98	Lactobacillus	0.98	Uncultured Lactobacillus sp. clone pAJ197 16S ribosomal RNA gene, partial sequence 99%	AY370183.1
Crop	KF599224	2011-07-01	H7_12_1M	K7	12	MRS	O2	27F & 1522R	Bacteria	1	Firmicutes	1	Bacilli	1	Lactobacillales	1	Lactobacillaceae	0.96	Lactobacillus	0.96	UnculturedLactobacillus sp. Mbopo2t6 16S ribosomal RNA gene, partial sequence gene 99%	HM534801.1
Crop	KF599227	2011-07-01	H7_2_4M	K7	2	MRS	CO2	27F & 1522R	Bacteria	1	Firmicutes	1	Bacilli	1	Lactobacillales	1	Lactobacillaceae	0.99	Lactobacillus	0.97	UnculturedLactobacillus sp. Mbopo2t6 16S ribosomal RNA gene, partial sequence gene 99%	HM534801.1
Crop	KF599228	2011-07-01	H7_5_1M	K7	5	MRS	CO2	27F & 1522R	Bacteria	1	Firmicutes	1	Bacilli	1	Lactobacillales	1	Lactobacillaceae	0.99	Lactobacillus	0.97	UnculturedLactobacillus sp. Mbopo2t6 16S ribosomal RNA gene, partial sequence gene 99%	HM534801.1
Crop	KF599230	2011-07-01	H7_6_6M	K7	6	MRS	CO2	27F & 1522R	Bacteria	1	Firmicutes	1	Bacilli	1	Lactobacillales	1	Lactobacillaceae	1	Lactobacillus	0.97	UnculturedLactobacillus sp. Mbopo2t6 16S ribosomal RNA gene, partial sequence gene 99%	HM534801.1
Crop	KF599239	2011-07-01	H8_12_5M	K8	12	MRS	O2	27F & 1522R	Bacteria	1	Firmicutes	1	Bacilli	1	Lactobacillales	1	Lactobacillaceae	0.99	Lactobacillus	0.99	UnculturedLactobacillus sp. Mbopo2t6 16S ribosomal RNA gene, partial sequence gene 99%	HM534801.1
Crop	KF599241	2011-07-01	H8_4_2M	K8	4	MRS	CO2	27F & 1522R	Bacteria	1	Firmicutes	1	Bacilli	1	Lactobacillales	1	Lactobacillaceae	0.99	Lactobacillus	0.97	UnculturedLactobacillus sp. Mbopo2t6 16S ribosomal RNA gene, partial sequence gene 99%	HM534801.1
Crop	KF599226	2011-07-01	H7_2_3M	K7	2	MRS	CO2	27F & 1522R	Bacteria	1	Firmicutes	1	Bacilli	1	Lactobacillales	1	Lactobacillaceae	0.99	Lactobacillus	0.97	UnculturedLactobacillus sp. Mbopo2t6 16S ribosomal RNA gene, partial sequence gene 99%	HM534801.1

## Sheet: NEW 04-19-12
Table S2. Accession numbers and RDP and NCBI classifications for crop culture isolates
Source (Tissue/Pollen)	Accession	Date of Collection	Isolate #	Colony	Alimentary Tract	Media	Cultureing Environment	Primers Used for Sequence	Domain		Phylum		Class		Order		Family		Genus		NCBI Hits and %Identity
Newly Emerged Bee Crop	KF599265	2011-04-19	1	A12	3	MRS	CO2	1522R	Bacteria	1	Firmicutes	1	Bacilli	1	Lactobacillales	1	Lactobacillaceae	1	Lactobacillus	1	Lactobacillus kunkeei strain 44-10 16S ribosomal RNA gene, partial sequence 100%	JQ009340.1
Newly Emerged Bee Crop	KF599270	2011-04-19	3	A13	2	MRS	CO2	1522R	Bacteria	1	Firmicutes	1	Bacilli	1	Lactobacillales	1	Lactobacillaceae	1	Lactobacillus	1	Lactobacillus kunkeei strain 44-10 16S ribosomal RNA gene, partial sequence 100%	JQ009340.1
Newly Emerged Bee Crop	KF599274	2011-04-19	7	A11	1	MRS	CO2	1522R	Bacteria	1	Firmicutes	1	Bacilli	1	Lactobacillales	1	Lactobacillaceae	1	Lactobacillus	1	Lactobacillus kunkeei strain 44-10 16S ribosomal RNA gene, partial sequence 100%	JQ009340.1
Newly Emerged Bee Crop	KF599276	2011-04-19	9	A11	2	MRS	CO2	1522R	Bacteria	1	Firmicutes	1	Bacilli	1	Lactobacillales	1	Lactobacillaceae	1	Lactobacillus	1	Lactobacillus kunkeei strain 44-10 16S ribosomal RNA gene, partial sequence 100%	JQ009340.1
Newly Emerged Bee Crop	KF599262	2011-04-19	13	A11	2	MRS	CO2	1522R	Bacteria	1	Firmicutes	1	Bacilli	1	Lactobacillales	1	Lactobacillaceae	1	Lactobacillus	1	Lactobacillus kunkeei strain 44-10 16S ribosomal RNA gene, partial sequence 100%	JQ009340.1
Newly Emerged Bee Crop	KF599263	2011-04-19	18	A12	1	MRS	CO2	1522R	Bacteria	1	Firmicutes	1	Bacilli	1	Lactobacillales	1	Lactobacillaceae	1	Lactobacillus	1	Lactobacillus kunkeei strain 44-10 16S ribosomal RNA gene, partial sequence 100%	JQ009340.1
Newly Emerged Bee Crop	KF599264	2011-04-19	19	A12	3	MRS	CO2	1522R	Bacteria	1	Firmicutes	1	Bacilli	1	Lactobacillales	1	Lactobacillaceae	1	Lactobacillus	1	Lactobacillus kunkeei strain 44-10 16S ribosomal RNA gene, partial sequence 100%	JQ009340.1
Newly Emerged Bee Crop	KF599271	2011-04-19	4	A13	2	MRS	CO2	1522R	Bacteria	1	Firmicutes	1	Bacilli	1	Lactobacillales	1	Lactobacillaceae	1	Lactobacillus	0.99	Lactobacillus kunkeei strain 44-10 16S ribosomal RNA gene, partial sequence 99%	JQ009340.1
Newly Emerged Bee Crop	KF599272	2011-04-19	5	A13	1	MRS	CO2	1522R	Bacteria	1	Firmicutes	1	Bacilli	1	Lactobacillales	1	Lactobacillaceae	1	Lactobacillus	1	Lactobacillus kunkeei strain 93-30 16S ribosomal RNA gene, partial sequence 100%	JQ009345.1
Newly Emerged Bee Crop	KF599275	2011-04-19	8	A11	1	MRS	CO2	1522R	Bacteria	1	Firmicutes	1	Bacilli	1	Lactobacillales	1	Lactobacillaceae	1	Lactobacillus	1	Lactobacillus kunkeei strain 93-30 16S ribosomal RNA gene, partial sequence 100%	JQ009345.1
Newly Emerged Bee Crop	KF599260	2011-04-19	10	A11	2	MRS	CO2	1522R	Bacteria	1	Firmicutes	1	Bacilli	1	Lactobacillales	1	Lactobacillaceae	1	Lactobacillus	1	Lactobacillus kunkeei strain 93-30 16S ribosomal RNA gene, partial sequence 100%	JQ009345.1
Newly Emerged Bee Crop	KF599269	2011-04-19	2	A12	1	MRS	CO2	1522R	Bacteria	1	Firmicutes	1	Bacilli	1	Lactobacillales	1	Lactobacillaceae	1	Lactobacillus	1	Lactobacillus kunkeei strain 93-30 16S ribosomal RNA gene, partial sequence 99%	JQ009345.1
Newly Emerged Bee Crop	KF599266	2011-04-19	20	A13	2	MRS	CO2	1522R	Bacteria	1	Firmicutes	1	Bacilli	1	Lactobacillales	1	Lactobacillaceae	0.97	Lactobacillus	0.97	Lactobacillus sp. Afpoto7 16S ribosomal RNA gene, partial sequence 99%	HM534804.1
Newly Emerged Bee Crop	KF599267	2011-04-19	21	A11	2	MRS	CO2	1522R	Bacteria	1	Firmicutes	1	Bacilli	1	Lactobacillales	1	Lactobacillaceae	0.99	Lactobacillus	0.99	Lactobacillus sp. Afpoto7 16S ribosomal RNA gene, partial sequence 99%	HM534804.1
Newly Emerged Bee Crop	KF599268	2011-04-19	24	A11	1	MRS	CO2	1522R	Bacteria	1	Firmicutes	1	Bacilli	1	Lactobacillales	1	Lactobacillaceae	0.97	Lactobacillus	0.97	Lactobacillus sp. Afpoto7 16S ribosomal RNA gene, partial sequence 99%	HM534804.1
Newly Emerged Bee Crop	KF599273	2011-04-19	6	A13	2	MRS	CO2	1522R	Bacteria	1	Firmicutes	1	Bacilli	1	Lactobacillales	1	Lactobacillaceae	0.99	Lactobacillus	0.99	Lactobacillus sp. Mbohs2t7 16S ribosomal RNA gene, partial sequence 100%	HM534798.1
Newly Emerged Bee Crop	KF599261	2011-04-19	12	A12	3	MRS	CO2	1522R	Bacteria	1	Firmicutes	1	Bacilli	1	Lactobacillales	1	Lactobacillaceae	1	Lactobacillus	1	Lactobacillus sp. Mbohs2t7 16S ribosomal RNA gene, partial sequence 100%	HM534798.1

## Sheet: NEW 05-02-12
Table S2. Accession numbers and RDP and NCBI classifications for crop culture isolates												Table S2. Accession numbers and RDP and NCBI classifications for crop culture isolates
Source (Tissue/Pollen)	Accession	Date of Collection	Isolate #	Colony	Alimentary Tract	Media	Cultureing Environment	Primers Used for Sequence	Domain		Phylum		Class		Order		Family		Genus		NCBI Hits and %Identity
Newly Emerged Bee Crop	KF599332	2012-05-02	21	A12	3	MRS	CO2	1522R	Bacteria	1	Firmicutes	1	Bacilli	1	Lactobacillales	1	Lactobacillaceae	0.99	Lactobacillus	0.99	Lactobacillus sp. Afpoto7 16S ribosomal RNA gene, partial sequence 100%	HM534804.1
Newly Emerged Bee Crop	KF599333	2012-05-02	22	A12	1	MRS	CO2	1522R	Bacteria	1	Firmicutes	1	Bacilli	1	Lactobacillales	1	Lactobacillaceae	0.97	Lactobacillus	0.97	Lactobacillus sp. Afpoto7 16S ribosomal RNA gene, partial sequence 100%	HM534804.1
Newly Emerged Bee Crop	KF599335	2012-05-02	29	A12	1	MRS	CO2	1522R	Bacteria	1	Firmicutes	1	Bacilli	1	Lactobacillales	1	Lactobacillaceae	0.97	Lactobacillus	0.97	Lactobacillus sp. Afpoto7 16S ribosomal RNA gene, partial sequence 100%	HM534804.1
Newly Emerged Bee Crop	KF599338	2012-05-02	35	A13	2	MRS	CO2	1522R	Bacteria	1	Firmicutes	1	Bacilli	1	Lactobacillales	1	Lactobacillaceae	0.97	Lactobacillus	0.97	Lactobacillus sp. Afpoto7 16S ribosomal RNA gene, partial sequence 100%	HM534804.1
Newly Emerged Bee Crop	KF599339	2012-05-02	38	A11	2	MRS	CO2	1522R	Bacteria	1	Firmicutes	1	Bacilli	1	Lactobacillales	1	Lactobacillaceae	0.97	Lactobacillus	0.97	Lactobacillus sp. Afpoto7 16S ribosomal RNA gene, partial sequence 100%	HM534804.1
Newly Emerged Bee Crop	KF599344	2012-05-02	61	A13	3	MRS	CO2	1522R	Bacteria	1	Firmicutes	1	Bacilli	1	Lactobacillales	1	Lactobacillaceae	0.97	Lactobacillus	0.97	Lactobacillus sp. Afpoto7 16S ribosomal RNA gene, partial sequence 100%	HM534804.1
Newly Emerged Bee Crop	KF599329	2012-05-02	17	A11	1	MRS	CO2	1522R	Bacteria	1	Firmicutes	1	Bacilli	1	Lactobacillales	1	Lactobacillaceae	0.97	Lactobacillus	0.97	Lactobacillus sp. Afpoto7 16S ribosomal RNA gene, partial sequence 99%	HM534804.1
Newly Emerged Bee Crop	KF599331	2012-05-02	20	A12	3	MRS	CO2	1522R	Bacteria	1	Firmicutes	1	Bacilli	1	Lactobacillales	1	Lactobacillaceae	0.97	Lactobacillus	0.97	Lactobacillus sp. Afpoto7 16S ribosomal RNA gene, partial sequence 99%	HM534804.1
Newly Emerged Bee Crop	KF599334	2012-05-02	28	A13	1	MRS	CO2	1522R	Bacteria	1	Firmicutes	1	Bacilli	1	Lactobacillales	1	Lactobacillaceae	0.94	Lactobacillus	0.93	Lactobacillus sp. Afpoto7 16S ribosomal RNA gene, partial sequence 99%	HM534804.1
Newly Emerged Bee Crop	KF599337	2012-05-02	31	A12	2	MRS	CO2	1522R	Bacteria	1	Firmicutes	1	Bacilli	1	Lactobacillales	1	Lactobacillaceae	0.96	Lactobacillus	0.96	Lactobacillus sp. Afpoto7 16S ribosomal RNA gene, partial sequence 99%	HM534804.1
Newly Emerged Bee Crop	KF599340	2012-05-02	39	A12	2	MRS	CO2	1522R	Bacteria	1	Firmicutes	1	Bacilli	1	Lactobacillales	1	Lactobacillaceae	1	Lactobacillus	1	Lactobacillus sp. Afpoto7 16S ribosomal RNA gene, partial sequence 99%	HM534804.1
Newly Emerged Bee Crop	KF599343	2012-05-02	60	A11	2	MRS	CO2	1522R	Bacteria	1	Firmicutes	0.99	Bacilli	0.99	Lactobacillales	0.99	Lactobacillaceae	0.91	Lactobacillus	0.9	Lactobacillus sp. Afpoto7 16S ribosomal RNA gene, partial sequence 99%	HM534804.1
Newly Emerged Bee Crop	KF599345	2012-05-02	66	A13	1	MRS	CO2	1522R	Bacteria	1	Firmicutes	1	Bacilli	1	Lactobacillales	1	Lactobacillaceae	0.96	Lactobacillus	0.96	Lactobacillus sp. Afpoto7 16S ribosomal RNA gene, partial sequence 99%	HM534804.1
Newly Emerged Bee Crop	KF599330	2012-05-02	19	A13	2	MRS	CO2	1522R	Bacteria	1	Firmicutes	1	Bacilli	1	Lactobacillales	1	Lactobacillaceae	0.9	Lactobacillus	0.9	Lactobacillus sp. Mbohs2t7 16S ribosomal RNA gene, partial sequence 100%	HM534798.1
Newly Emerged Bee Crop	KF599342	2012-05-02	55	A11	2	MRS	CO2	1522R	Bacteria	1	Firmicutes	1	Bacilli	1	Lactobacillales	1	Lactobacillaceae	1	Lactobacillus	1	Lactobacillus sp. Mbopo2t6 16S ribosomal RNA gene, partial sequence	HM534801.1
Newly Emerged Bee Crop	KF599341	2012-05-02	54	A11	3	MRS	CO2	1522R	Bacteria	1	Firmicutes	1	Bacilli	1	Lactobacillales	1	Lactobacillaceae	1	Lactobacillus	1	Lactobacillus sp. Mbopo2t6 16S ribosomal RNA gene, partial sequence 100%	HM534801.1
Newly Emerged Bee Crop	KF599336	2012-05-02	30	A11	1	MRS	CO2	1522R	Bacteria	1	Firmicutes	1	Bacilli	1	Lactobacillales	1	Lactobacillaceae	0.99	Lactobacillus	0.99	Lactobacillus sp. Mbopo2t6 16S ribosomal RNA gene, partial sequence 99%	HM534801.1

## Sheet: NEW 05-12-12
Table S2. Accession numbers and RDP and NCBI classifications for crop culture isolates
Source (Tissue/Pollen)	Accession	Date of Collection	Isolate #	Colony	Alimentary Tract	Media	Cultureing Environment	Primers Used for Sequence	Domain		Phylum		Class		Order		Family		Genus		NCBI Hits and %Identity
Newly Emerged Bee Crop	KF599294	2012-05-12	2	A11	3	MRS	CO2	1522R	Bacteria	1	Firmicutes	1	Bacilli	1	Lactobacillales	1	Lactobacillaceae	1	Lactobacillus	1	Lactobacillus kunkeei strain 44-10 16S ribosomal RNA gene, partial sequence 100%	JQ009340.1
Newly Emerged Bee Crop	KF599295	2012-05-12	3	A11	1	MRS	CO2	1522R	Bacteria	1	Firmicutes	1	Bacilli	1	Lactobacillales	1	Lactobacillaceae	1	Lactobacillus	1	Lactobacillus kunkeei strain 44-10 16S ribosomal RNA gene, partial sequence 100%	JQ009340.1
Newly Emerged Bee Crop	KF599296	2012-05-12	4	A12	3	MRS	CO2	1522R	Bacteria	1	Firmicutes	1	Bacilli	1	Lactobacillales	1	Lactobacillaceae	1	Lactobacillus	1	Lactobacillus kunkeei strain 44-10 16S ribosomal RNA gene, partial sequence 100%	JQ009340.1
Newly Emerged Bee Crop	KF599297	2012-05-12	5	A12	1	MRS	CO2	1522R	Bacteria	1	Firmicutes	1	Bacilli	1	Lactobacillales	1	Lactobacillaceae	1	Lactobacillus	1	Lactobacillus kunkeei strain 44-10 16S ribosomal RNA gene, partial sequence 100%	JQ009340.1
Newly Emerged Bee Crop	KF599298	2012-05-12	6	A12	3	MRS	CO2	1522R	Bacteria	1	Firmicutes	1	Bacilli	1	Lactobacillales	1	Lactobacillaceae	1	Lactobacillus	1	Lactobacillus kunkeei strain 44-10 16S ribosomal RNA gene, partial sequence 100%	JQ009340.1
Newly Emerged Bee Crop	KF599300	2012-05-12	8	A13	1	MRS	CO2	1522R	Bacteria	1	Firmicutes	1	Bacilli	1	Lactobacillales	1	Lactobacillaceae	1	Lactobacillus	1	Lactobacillus kunkeei strain 44-10 16S ribosomal RNA gene, partial sequence 100%	JQ009340.1
Newly Emerged Bee Crop	KF599301	2012-05-12	9	A13	1	MRS	CO2	1522R	Bacteria	1	Firmicutes	1	Bacilli	1	Lactobacillales	1	Lactobacillaceae	1	Lactobacillus	1	Lactobacillus kunkeei strain 44-10 16S ribosomal RNA gene, partial sequence 100%	JQ009340.1
Newly Emerged Bee Crop	KF599286	2012-05-12	1	A11	2	MRS	CO2	1522R	Bacteria	1	Firmicutes	1	Bacilli	1	Lactobacillales	1	Lactobacillaceae	1	Lactobacillus	0.99	Lactobacillus kunkeei strain 44-10 16S ribosomal RNA gene, partial sequence 99%	JQ009340.1
Newly Emerged Bee Crop	KF599299	2012-05-12	7	A12	2	MRS	CO2	1522R	Bacteria	1	Firmicutes	1	Bacilli	1	Lactobacillales	1	Lactobacillaceae	1	Lactobacillus	1	Lactobacillus kunkeei strain 93-30 16S ribosomal RNA gene, partial sequence 100%	JQ009345.1
Newly Emerged Bee Crop	KF599278	2012-05-12	12	A13	1	MRS	CO2	1522R	Bacteria	1	Firmicutes	1	Bacilli	1	Lactobacillales	1	Lactobacillaceae	1	Lactobacillus	1	Lactobacillus sp. Afpoto7 16S ribosomal RNA gene, partial sequence 99%	HM534804.1
Newly Emerged Bee Crop	KF599279	2012-05-12	13	A13	2	MRS	CO2	1522R	Bacteria	1	Firmicutes	1	Bacilli	1	Lactobacillales	1	Lactobacillaceae	1	Lactobacillus	1	Lactobacillus sp. Afpoto7 16S ribosomal RNA gene, partial sequence 99%	HM534804.1
Newly Emerged Bee Crop	KF599280	2012-05-12	14	A13	3	MRS	CO2	1522R	Bacteria	1	Firmicutes	1	Bacilli	1	Lactobacillales	1	Lactobacillaceae	1	Lactobacillus	1	Lactobacillus sp. Afpoto7 16S ribosomal RNA gene, partial sequence 99%	HM534804.1
Newly Emerged Bee Crop	KF599281	2012-05-12	15	A11	1	MRS	CO2	1522R	Bacteria	1	Firmicutes	1	Bacilli	1	Lactobacillales	1	Lactobacillaceae	1	Lactobacillus	1	Lactobacillus sp. Afpoto7 16S ribosomal RNA gene, partial sequence 99%	HM534804.1
Newly Emerged Bee Crop	KF599282	2012-05-12	16	A11	1	MRS	CO2	1522R	Bacteria	1	Firmicutes	1	Bacilli	1	Lactobacillales	1	Lactobacillaceae	1	Lactobacillus	1	Lactobacillus sp. Afpoto7 16S ribosomal RNA gene, partial sequence 99%	HM534804.1
Newly Emerged Bee Crop	KF599283	2012-05-12	17	A11	3	MRS	CO2	1522R	Bacteria	1	Firmicutes	1	Bacilli	1	Lactobacillales	1	Lactobacillaceae	0.97	Lactobacillus	0.97	Lactobacillus sp. Afpoto7 16S ribosomal RNA gene, partial sequence 99%	HM534804.1
Newly Emerged Bee Crop	KF599284	2012-05-12	18	A11	2	MRS	CO2	1522R	Bacteria	1	Firmicutes	1	Bacilli	1	Lactobacillales	1	Lactobacillaceae	0.98	Lactobacillus	0.98	Lactobacillus sp. Afpoto7 16S ribosomal RNA gene, partial sequence 99%	HM534804.1
Newly Emerged Bee Crop	KF599285	2012-05-12	19	A11	3	MRS	CO2	1522R	Bacteria	1	Firmicutes	1	Bacilli	1	Lactobacillales	1	Lactobacillaceae	1	Lactobacillus	1	Lactobacillus sp. Afpoto7 16S ribosomal RNA gene, partial sequence 99%	HM534804.1
Newly Emerged Bee Crop	KF599287	2012-05-12	20	A12	3	MRS	CO2	1522R	Bacteria	1	Firmicutes	1	Bacilli	1	Lactobacillales	1	Lactobacillaceae	1	Lactobacillus	1	Lactobacillus sp. Afpoto7 16S ribosomal RNA gene, partial sequence 99%	HM534804.1
Newly Emerged Bee Crop	KF599288	2012-05-12	21	A12	3	MRS	CO2	1522R	Bacteria	1	Firmicutes	1	Bacilli	1	Lactobacillales	1	Lactobacillaceae	1	Lactobacillus	1	Lactobacillus sp. Afpoto7 16S ribosomal RNA gene, partial sequence 99%	HM534804.1
Newly Emerged Bee Crop	KF599289	2012-05-12	22	A12	2	MRS	CO2	1522R	Bacteria	1	Firmicutes	1	Bacilli	1	Lactobacillales	1	Lactobacillaceae	1	Lactobacillus	1	Lactobacillus sp. Afpoto7 16S ribosomal RNA gene, partial sequence 99%	HM534804.1
Newly Emerged Bee Crop	KF599290	2012-05-12	23	A13	1	MRS	CO2	1522R	Bacteria	1	Firmicutes	1	Bacilli	1	Lactobacillales	1	Lactobacillaceae	1	Lactobacillus	1	Lactobacillus sp. Afpoto7 16S ribosomal RNA gene, partial sequence 99%	HM534804.1
Newly Emerged Bee Crop	KF599291	2012-05-12	24	A13	1	MRS	CO2	1522R	Bacteria	1	Firmicutes	1	Bacilli	1	Lactobacillales	1	Lactobacillaceae	1	Lactobacillus	1	Lactobacillus sp. Afpoto7 16S ribosomal RNA gene, partial sequence 99%	HM534804.1
Newly Emerged Bee Crop	KF599292	2012-05-12	25	A13	1	MRS	CO2	1522R	Bacteria	1	Firmicutes	1	Bacilli	1	Lactobacillales	1	Lactobacillaceae	1	Lactobacillus	1	Lactobacillus sp. Afpoto7 16S ribosomal RNA gene, partial sequence 99%	HM534804.1
Newly Emerged Bee Crop	KF599293	2012-05-12	26	A13	2	MRS	CO2	1522R	Bacteria	1	Firmicutes	1	Bacilli	1	Lactobacillales	1	Lactobacillaceae	1	Lactobacillus	1	Lactobacillus sp. Afpoto7 16S ribosomal RNA gene, partial sequence 99%	HM534804.1
Newly Emerged Bee Crop	KF599277	2012-05-12	11	A13	2	MRS	CO2	1522R	Bacteria	1	Firmicutes	1	Bacilli	1	Lactobacillales	1	Lactobacillaceae	1	Lactobacillus	1	Lactobacillus sp. Afpoto7 16S ribosomal RNA gene, partial sequence 99%	HM534804.1

## Sheet: NEW 05-23-12
Table S2. Accession numbers and RDP and NCBI classifications for crop culture isolates
Source (Tissue/Pollen)	Accession	Date of Collection	Isolate #	Colony	Alimentary Tract	Media	Cultureing Environment	Primers Used for Sequence	Domain		Phylum		Class		Order		Family		Genus		NCBI Hits and %Identity
Newly Emerged Bee Crop	KF599304	2012-05-23	21	A12	2	MRS	CO2	1522R	Bacteria	1	Firmicutes	1	Bacilli	1	Lactobacillales	1	Lactobacillaceae	1	Lactobacillus	1	Lactobacillus kunkeei strain 44-10 16S ribosomal RNA gene, partial sequence 100%	JQ009340.1
Newly Emerged Bee Crop	KF599305	2012-05-23	23	A11	1	MRS	CO2	1522R	Bacteria	1	Firmicutes	1	Bacilli	1	Lactobacillales	1	Lactobacillaceae	1	Lactobacillus	1	Lactobacillus kunkeei strain 44-10 16S ribosomal RNA gene, partial sequence 100%	JQ009340.1
Newly Emerged Bee Crop	KF599307	2012-05-23	35	A12	1	MRS	CO2	1522R	Bacteria	1	Firmicutes	1	Bacilli	1	Lactobacillales	1	Lactobacillaceae	1	Lactobacillus	1	Lactobacillus kunkeei strain 44-10 16S ribosomal RNA gene, partial sequence 100%	JQ009340.1
Newly Emerged Bee Crop	KF599320	2012-05-23	56	A13	3	MRS	CO2	1522R	Bacteria	1	Firmicutes	1	Bacilli	1	Lactobacillales	1	Lactobacillaceae	1	Lactobacillus	1	Lactobacillus kunkeei strain 44-10 16S ribosomal RNA gene, partial sequence 100%	JQ009340.1
Newly Emerged Bee Crop	KF599318	2012-05-23	53	A12	2	MRS	CO2	1522R	Bacteria	1	Firmicutes	1	Bacilli	1	Lactobacillales	1	Lactobacillaceae	1	Lactobacillus	0.99	Lactobacillus kunkeei strain 44-10 16S ribosomal RNA gene, partial sequence 99%	JQ009340.1
Newly Emerged Bee Crop	KF599322	2012-05-23	61	A11	2	MRS	CO2	1522R	Bacteria	1	Firmicutes	1	Bacilli	1	Lactobacillales	1	Lactobacillaceae	1	Lactobacillus	1	Lactobacillus kunkeei strain 44-10 16S ribosomal RNA gene, partial sequence 99%	JQ009340.1
Newly Emerged Bee Crop	KF599319	2012-05-23	54	A12	3	MRS	CO2	1522R	Bacteria	1	Firmicutes	1	Bacilli	1	Lactobacillales	1	Lactobacillaceae	1	Lactobacillus	1	Lactobacillus kunkeei strain 93-30 16S ribosomal RNA gene, partial sequence 100%	JQ009345.1
Newly Emerged Bee Crop	KF599321	2012-05-23	57	A13	2	MRS	CO2	1522R	Bacteria	1	Firmicutes	1	Bacilli	1	Lactobacillales	1	Lactobacillaceae	1	Lactobacillus	1	Lactobacillus kunkeei strain 93-30 16S ribosomal RNA gene, partial sequence 100%	JQ009345.1
Newly Emerged Bee Crop	KF599324	2012-05-23	63	A11	3	MRS	CO2	1522R	Bacteria	1	Firmicutes	1	Bacilli	1	Lactobacillales	1	Lactobacillaceae	1	Lactobacillus	1	Lactobacillus kunkeei strain 93-30 16S ribosomal RNA gene, partial sequence 100%	JQ009345.1
Newly Emerged Bee Crop	KF599325	2012-05-23	64	A12	3	MRS	CO2	1522R	Bacteria	1	Firmicutes	1	Bacilli	1	Lactobacillales	1	Lactobacillaceae	1	Lactobacillus	0.99	Lactobacillus kunkeei strain 93-30 16S ribosomal RNA gene, partial sequence 100%	JQ009345.1
Newly Emerged Bee Crop	KF599303	2012-05-23	17	A11	1	MRS	CO2	1522R	Bacteria	1	Firmicutes	1	Bacilli	1	Lactobacillales	1	Lactobacillaceae	0.99	Lactobacillus	0.98	Lactobacillus kunkeei strain 93-30 16S ribosomal RNA gene, partial sequence 99%	JQ009345.1
Newly Emerged Bee Crop	KF599323	2012-05-23	62	A13	1	MRS	CO2	1522R	Bacteria	1	Firmicutes	1	Bacilli	1	Lactobacillales	1	Lactobacillaceae	1	Lactobacillus	1	Lactobacillus kunkeei strain 93-30 16S ribosomal RNA gene, partial sequence 99%	JQ009345.1
Newly Emerged Bee Crop	KF599308	2012-05-23	36	A11	2	MRS	CO2	1522R	Bacteria	1	Firmicutes	1	Bacilli	1	Lactobacillales	1	Lactobacillaceae	0.97	Lactobacillus	0.97	Lactobacillus sp. Afpoto7 16S ribosomal RNA gene, partial sequence 100%	HM534804.1
Newly Emerged Bee Crop	KF599309	2012-05-23	37	A11	1	MRS	CO2	1522R	Bacteria	1	Firmicutes	1	Bacilli	1	Lactobacillales	1	Lactobacillaceae	0.97	Lactobacillus	0.97	Lactobacillus sp. Afpoto7 16S ribosomal RNA gene, partial sequence 100%	HM534804.1
Newly Emerged Bee Crop	KF599310	2012-05-23	38	A12	3	MRS	CO2	1522R	Bacteria	1	Firmicutes	1	Bacilli	1	Lactobacillales	1	Lactobacillaceae	0.97	Lactobacillus	0.97	Lactobacillus sp. Afpoto7 16S ribosomal RNA gene, partial sequence 100%	HM534804.1
Newly Emerged Bee Crop	KF599311	2012-05-23	39	A12	3	MRS	CO2	1522R	Bacteria	1	Firmicutes	1	Bacilli	1	Lactobacillales	1	Lactobacillaceae	0.97	Lactobacillus	0.97	Lactobacillus sp. Afpoto7 16S ribosomal RNA gene, partial sequence 100%	HM534804.1
Newly Emerged Bee Crop	KF599313	2012-05-23	40	A12	1	MRS	CO2	1522R	Bacteria	1	Firmicutes	1	Bacilli	1	Lactobacillales	1	Lactobacillaceae	0.97	Lactobacillus	0.97	Lactobacillus sp. Afpoto7 16S ribosomal RNA gene, partial sequence 100%	HM534804.1
Newly Emerged Bee Crop	KF599314	2012-05-23	46	A12	2	MRS	CO2	1522R	Bacteria	1	Firmicutes	1	Bacilli	1	Lactobacillales	1	Lactobacillaceae	0.97	Lactobacillus	0.97	Lactobacillus sp. Afpoto7 16S ribosomal RNA gene, partial sequence 100%	HM534804.1
Newly Emerged Bee Crop	KF599316	2012-05-23	49	A11	3	MRS	CO2	1522R	Bacteria	1	Firmicutes	1	Bacilli	1	Lactobacillales	1	Lactobacillaceae	0.97	Lactobacillus	0.97	Lactobacillus sp. Afpoto7 16S ribosomal RNA gene, partial sequence 100%	HM534804.1
Newly Emerged Bee Crop	KF599315	2012-05-23	47	A13	1	MRS	CO2	1522R	Bacteria	1	Firmicutes	1	Bacilli	1	Lactobacillales	1	Lactobacillaceae	0.94	Lactobacillus	0.94	Lactobacillus sp. Afpoto7 16S ribosomal RNA gene, partial sequence 99%	HM534804.1
Newly Emerged Bee Crop	KF599328	2012-05-23	9	A11	3	MRS	CO2	1522R	Bacteria	1	Firmicutes	1	Bacilli	1	Lactobacillales	1	Lactobacillaceae	0.96	Lactobacillus	0.66	Lactobacillus sp. Mboho2r2 16S ribosomal RNA gene, partial sequence 100%	HM534813.1
Newly Emerged Bee Crop	KF599306	2012-05-23	2	A11	2	MRS	CO2	1522R	Bacteria	1	Firmicutes	1	Bacilli	1	Lactobacillales	1	Lactobacillaceae	0.99	Lactobacillus	0.86	Lactobacillus sp. Mboho2r2 16S ribosomal RNA gene, partial sequence 100%	HM534813.1
Newly Emerged Bee Crop	KF599312	2012-05-23	3	A13	3	MRS	CO2	1522R	Bacteria	1	Firmicutes	1	Bacilli	1	Lactobacillales	1	Lactobacillaceae	0.99	Lactobacillus	0.98	Lactobacillus sp. Mbohs2t7 16S ribosomal RNA gene, partial sequence 100%	HM534798.1
Newly Emerged Bee Crop	KF599317	2012-05-23	4	A13	1	MRS	CO2	1522R	Bacteria	1	Firmicutes	1	Bacilli	1	Lactobacillales	1	Lactobacillaceae	1	Lactobacillus	1	Lactobacillus sp. Mbohs2t7 16S ribosomal RNA gene, partial sequence 100%	HM534798.1
Newly Emerged Bee Crop	KF599326	2012-05-23	7	A13	1	MRS	CO2	1522R	Bacteria	1	Firmicutes	0.99	Bacilli	0.99	Lactobacillales	0.99	Lactobacillaceae	0.73	Lactobacillus	0.71	Lactobacillus sp. Mbohs2t7 16S ribosomal RNA gene, partial sequence 100%	HM534798.1
Newly Emerged Bee Crop	KF599327	2012-05-23	8	A13	3	MRS	CO2	1522R	Bacteria	1	Firmicutes	1	Bacilli	1	Lactobacillales	1	Lactobacillaceae	1	Lactobacillus	1	Lactobacillus sp. Mbohs2t7 16S ribosomal RNA gene, partial sequence 100%	HM534798.1
Newly Emerged Bee Crop	KF599302	2012-05-23	12	A13	2	MRS	CO2	1522R	Bacteria	1	Firmicutes	1	Bacilli	1	Lactobacillales	1	Lactobacillaceae	1	Lactobacillus	1	Lactobacillus sp. Mbohs2t7 16S ribosomal RNA gene, partial sequence 100%	HM534798.1

## Sheet: TSA 10-01-11
Table S2. Accession numbers and RDP and NCBI classifications for crop culture isolates
Source (Tissue/Pollen)	Accession	Date of Collection	Isolate #	Colony	Alimentary Tract	Media	Cultureing Environment	Primers Used for Sequence	Domain		Phylum		Class		Order		Family		Genus		NCBI Hits and %Identity
Crop	KF599362	2011-10-01	H19_1_1T	19	1	TSA	CO2	27F & 1522R	Bacteria	1	Proteobacteria	1	Alphaproteobacteria	1	Rhodospirillales	1	Acetobacteraceae	1	Asaia	1	Asaia bogorensis gene for 16S rRNA, partial sequence, strain NBRC 103478 99%	AB682065.1
Crop	KF599379	2011-10-01	H20_1_2T	20	1	TSA	CO2	27F & 1522R	Bacteria	1	Proteobacteria	1	Alphaproteobacteria	1	Rhodospirillales	1	Acetobacteraceae	1	Asaia	1	Asaia bogorensis gene for 16S rRNA, partial sequence, strain NBRC 103478 99%	AB682065.1
Crop	KF599384	2011-10-01	H20_4_2T	20	7	TSA	CO2	27F & 1522R	Bacteria	1	Proteobacteria	1	Alphaproteobacteria	1	Rhodospirillales	1	Acetobacteraceae	1	Asaia	1	Asaia bogorensis gene for 16S rRNA, partial sequence, strain NBRC 103478 99%	AB682065.1
Crop	KF599393	2011-10-01	H20_9_1T	20	9	TSA	CO2	27F & 1522R	Bacteria	1	Proteobacteria	1	Alphaproteobacteria	1	Rhodospirillales	1	Acetobacteraceae	1	Asaia	1	Asaia bogorensis gene for 16S rRNA, partial sequence, strain NBRC 103478 99%	AB682065.1
Crop	KF599360	2011-10-01	H14_9_1T	14	9	TSA	CO2	27F & 1522R	Bacteria	1	Proteobacteria	1	Betaproteobacteria	1	Neisseriales	1	Neisseriaceae	1	Kingella	0.45	Candidatus Snodgrassella alvi strain wkB2 16S ribosomal RNA gene, complete sequence 99%	JQ746651.1
Crop	KF599349	2011-10-01	H14_2_1T	14	2	TSA	O2	27F & 1522R	Bacteria	1	Firmicutes	1	Bacilli	1	Lactobacillales	1	Leuconostocaceae	1	Fructobacillus	1	Fructobacillus fructosus gene for 16S rRNA, partial sequence, strain NBRC 3516 99%	AB680098.1
Crop	KF599364	2011-10-01	H19_10_2T	19	10	TSA	CO2	27F & 1522R	Bacteria	1	Firmicutes	1	Bacilli	1	Lactobacillales	1	Leuconostocaceae	1	Fructobacillus	1	Fructobacillus fructosus gene for 16S rRNA, partial sequence, strain NBRC 3516 99%	AB680098.1
Crop	KF599377	2011-10-01	H19_9_1T	19	8	TSA	CO2	27F & 1522R	Bacteria	1	Firmicutes	1	Bacilli	1	Lactobacillales	1	Leuconostocaceae	1	Fructobacillus	1	Fructobacillus fructosus gene for 16S rRNA, partial sequence, strain NBRC 3516 99%	AB680098.1
Crop	KF599381	2011-10-01	H20_3_1T	20	3	TSA	CO2	27F & 1522R	Bacteria	1	Firmicutes	1	Bacilli	1	Lactobacillales	1	Leuconostocaceae	1	Fructobacillus	1	Fructobacillus fructosus gene for 16S rRNA, partial sequence, strain NBRC 3516 99%	AB680098.1
Crop	KF599391	2011-10-01	H20_7_3T	20	7	TSA	CO2	27F & 1522R	Bacteria	1	Firmicutes	1	Bacilli	1	Lactobacillales	1	Leuconostocaceae	1	Fructobacillus	1	Fructobacillus fructosus gene for 16S rRNA, partial sequence, strain NBRC 3516 99%	AB680098.1
Crop	KF599346	2011-10-01	H14_1_2T	14	1	TSA	CO2	27F & 1522R	Bacteria	1	Firmicutes	1	Bacilli	1	Lactobacillales	1	Lactobacillaceae	1	Lactobacillus	1	Lactobacillus kunkeei gene for 16S rRNA, partial sequence, strain F10-3 99%	AB498040.2
Crop	KF599350	2011-10-01	H14_2_2T	14	2	TSA	CO2	27F & 1522R	Bacteria	1	Firmicutes	1	Bacilli	1	Lactobacillales	1	Lactobacillaceae	1	Lactobacillus	1	Lactobacillus kunkeei strain 100-1 16S ribosomal RNA gene, partial sequence 100%	JQ009336.1
Crop	KF599352	2011-10-01	H14_3_1T_	14	3	TSA	CO2	27F & 1522R	Bacteria	1	Firmicutes	1	Bacilli	1	Lactobacillales	1	Lactobacillaceae	1	Lactobacillus	1	Lactobacillus kunkeei strain 100-1 16S ribosomal RNA gene, partial sequence 100%	JQ009336.1
Crop	KF599354	2011-10-01	H14_5_1T	14	5	TSA	CO2	27F & 1522R	Bacteria	1	Firmicutes	1	Bacilli	1	Lactobacillales	1	Lactobacillaceae	1	Lactobacillus	1	Lactobacillus kunkeei strain 100-1 16S ribosomal RNA gene, partial sequence 100%	JQ009336.1
Crop	KF599372	2011-10-01	H19_6_1T	19	6	TSA	CO2	27F & 1522R	Bacteria	1	Firmicutes	1	Bacilli	1	Lactobacillales	1	Lactobacillaceae	1	Lactobacillus	1	Lactobacillus kunkeei strain 100-1 16S ribosomal RNA gene, partial sequence 100%	JQ009336.1
Crop	KF599383	2011-10-01	H20_3_3T	20	3	TSA	CO2	27F & 1522R	Bacteria	1	Firmicutes	1	Bacilli	1	Lactobacillales	1	Lactobacillaceae	1	Lactobacillus	1	Lactobacillus kunkeei strain 100-1 16S ribosomal RNA gene, partial sequence 100%	JQ009336.1
Crop	KF599367	2011-10-01	H19_3_2T	19	3	TSA	O2	27F & 1522R	Bacteria	1	Firmicutes	1	Bacilli	1	Lactobacillales	1	Lactobacillaceae	1	Lactobacillus	1	Lactobacillus kunkeei strain 100-1 16S ribosomal RNA gene, partial sequence 99%	JQ009336.1
Crop	KF599347	2011-10-01	H14_10_1T	14	10	TSA	CO2	27F & 1522R	Bacteria	1	Firmicutes	1	Bacilli	1	Lactobacillales	1	Lactobacillaceae	1	Lactobacillus	1	Lactobacillus kunkeei strain 100-1 16S ribosomal RNA gene, partial sequence 99%	JQ009336.1
Crop	KF599348	2011-10-01	H14_10_2T	14	10	TSA	CO2	27F & 1522R	Bacteria	1	Firmicutes	1	Bacilli	1	Lactobacillales	1	Lactobacillaceae	1	Lactobacillus	1	Lactobacillus kunkeei strain 100-1 16S ribosomal RNA gene, partial sequence 99%	JQ009336.1
Crop	KF599351	2011-10-01	H14_2_2T	14	2	TSA	O2	27F & 1522R	Bacteria	1	Firmicutes	1	Bacilli	1	Lactobacillales	1	Lactobacillaceae	1	Lactobacillus	1	Lactobacillus kunkeei strain 100-1 16S ribosomal RNA gene, partial sequence 99%	JQ009336.1
Crop	KF599353	2011-10-01	H14_4_1T	14	4	TSA	CO2	27F & 1522R	Bacteria	1	Firmicutes	1	Bacilli	1	Lactobacillales	1	Lactobacillaceae	1	Lactobacillus	1	Lactobacillus kunkeei strain 100-1 16S ribosomal RNA gene, partial sequence 99%	JQ009336.1
Crop	KF599355	2011-10-01	H14_6_3T	14	6	TSA	CO2	27F & 1522R	Bacteria	1	Firmicutes	1	Bacilli	1	Lactobacillales	1	Lactobacillaceae	1	Lactobacillus	1	Lactobacillus kunkeei strain 100-1 16S ribosomal RNA gene, partial sequence 99%	JQ009336.1
Crop	KF599356	2011-10-01	H14_7_1T	14	7	TSA	CO2	27F & 1522R	Bacteria	1	Firmicutes	1	Bacilli	1	Lactobacillales	1	Lactobacillaceae	1	Lactobacillus	1	Lactobacillus kunkeei strain 100-1 16S ribosomal RNA gene, partial sequence 99%	JQ009336.1
Crop	KF599357	2011-10-01	H14_7_2T	14	7	TSA	CO2	27F & 1522R	Bacteria	1	Firmicutes	1	Bacilli	1	Lactobacillales	1	Lactobacillaceae	1	Lactobacillus	1	Lactobacillus kunkeei strain 100-1 16S ribosomal RNA gene, partial sequence 99%	JQ009336.1
Crop	KF599358	2011-10-01	H14_8_1T	14	8	TSA	CO2	27F & 1522R	Bacteria	1	Firmicutes	1	Bacilli	1	Lactobacillales	1	Lactobacillaceae	1	Lactobacillus	1	Lactobacillus kunkeei strain 100-1 16S ribosomal RNA gene, partial sequence 99%	JQ009336.1
Crop	KF599359	2011-10-01	H14_8_2T	14	8	TSA	CO2	27F & 1522R	Bacteria	1	Firmicutes	1	Bacilli	1	Lactobacillales	1	Lactobacillaceae	1	Lactobacillus	1	Lactobacillus kunkeei strain 100-1 16S ribosomal RNA gene, partial sequence 99%	JQ009336.1
Crop	KF599361	2011-10-01	H14_9_3T	14	9	TSA	CO2	27F & 1522R	Bacteria	1	Firmicutes	1	Bacilli	1	Lactobacillales	1	Lactobacillaceae	1	Lactobacillus	1	Lactobacillus kunkeei strain 100-1 16S ribosomal RNA gene, partial sequence 99%	JQ009336.1
Crop	KF599365	2011-10-01	H19_2_3T	19	2	TSA	CO2	27F & 1522R	Bacteria	1	Firmicutes	1	Bacilli	1	Lactobacillales	1	Lactobacillaceae	1	Lactobacillus	1	Lactobacillus kunkeei strain 100-1 16S ribosomal RNA gene, partial sequence 99%	JQ009336.1
Crop	KF599366	2011-10-01	H19_3_1T	19	3	TSA	O2	27F & 1522R	Bacteria	1	Firmicutes	1	Bacilli	1	Lactobacillales	1	Lactobacillaceae	1	Lactobacillus	1	Lactobacillus kunkeei strain 100-1 16S ribosomal RNA gene, partial sequence 99%	JQ009336.1
Crop	KF599368	2011-10-01	H19_4_1T	19	4	TSA	CO2	27F & 1522R	Bacteria	1	Firmicutes	1	Bacilli	1	Lactobacillales	1	Lactobacillaceae	1	Lactobacillus	1	Lactobacillus kunkeei strain 100-1 16S ribosomal RNA gene, partial sequence 99%	JQ009336.1
Crop	KF599369	2011-10-01	H19_4_2T	19	4	TSA	CO2	27F & 1522R	Bacteria	1	Firmicutes	1	Bacilli	1	Lactobacillales	1	Lactobacillaceae	1	Lactobacillus	1	Lactobacillus kunkeei strain 100-1 16S ribosomal RNA gene, partial sequence 99%	JQ009336.1
Crop	KF599370	2011-10-01	H19_5_1T	19	5	TSA	CO2	27F & 1522R	Bacteria	1	Firmicutes	1	Bacilli	1	Lactobacillales	1	Lactobacillaceae	1	Lactobacillus	1	Lactobacillus kunkeei strain 100-1 16S ribosomal RNA gene, partial sequence 99%	JQ009336.1
Crop	KF599371	2011-10-01	H19_5_2T	19	5	TSA	CO2	27F & 1522R	Bacteria	1	Firmicutes	1	Bacilli	1	Lactobacillales	1	Lactobacillaceae	1	Lactobacillus	1	Lactobacillus kunkeei strain 100-1 16S ribosomal RNA gene, partial sequence 99%	JQ009336.1
Crop	KF599373	2011-10-01	H19_7_1T	19	7	TSA	O2	27F & 1522R	Bacteria	1	Firmicutes	1	Bacilli	1	Lactobacillales	1	Lactobacillaceae	1	Lactobacillus	1	Lactobacillus kunkeei strain 100-1 16S ribosomal RNA gene, partial sequence 99%	JQ009336.1
Crop	KF599375	2011-10-01	H19_7_3T	19	7	TSA	CO2	27F & 1522R	Bacteria	1	Firmicutes	1	Bacilli	1	Lactobacillales	1	Lactobacillaceae	1	Lactobacillus	1	Lactobacillus kunkeei strain 100-1 16S ribosomal RNA gene, partial sequence 99%	JQ009336.1
Crop	KF599376	2011-10-01	H19_8_1T	19	8	TSA	CO2	27F & 1522R	Bacteria	1	Firmicutes	1	Bacilli	1	Lactobacillales	1	Lactobacillaceae	1	Lactobacillus	1	Lactobacillus kunkeei strain 100-1 16S ribosomal RNA gene, partial sequence 99%	JQ009336.1
Crop	KF599378	2011-10-01	H20_1_1T	20	1	TSA	CO2	27F & 1522R	Bacteria	1	Firmicutes	1	Bacilli	1	Lactobacillales	1	Lactobacillaceae	1	Lactobacillus	1	Lactobacillus kunkeei strain 100-1 16S ribosomal RNA gene, partial sequence 99%	JQ009336.1
Crop	KF599382	2011-10-01	H20_3_1T	20	3	TSA	O2	27F & 1522R	Bacteria	1	Firmicutes	1	Bacilli	1	Lactobacillales	1	Lactobacillaceae	1	Lactobacillus	1	Lactobacillus kunkeei strain 100-1 16S ribosomal RNA gene, partial sequence 99%	JQ009336.1
Crop	KF599385	2011-10-01	H20_5_1T	20	5	TSA	CO2	27F & 1522R	Bacteria	1	Firmicutes	1	Bacilli	1	Lactobacillales	1	Lactobacillaceae	1	Lactobacillus	1	Lactobacillus kunkeei strain 100-1 16S ribosomal RNA gene, partial sequence 99%	JQ009336.1
Crop	KF599388	2011-10-01	H20_6_1T	20	6	TSA	O2	27F & 1522R	Bacteria	1	Firmicutes	1	Bacilli	1	Lactobacillales	1	Lactobacillaceae	1	Lactobacillus	1	Lactobacillus kunkeei strain 100-1 16S ribosomal RNA gene, partial sequence 99%	JQ009336.1
Crop	KF599389	2011-10-01	H20_6_2T	20	6	TSA	CO2	27F & 1522R	Bacteria	1	Firmicutes	1	Bacilli	1	Lactobacillales	1	Lactobacillaceae	1	Lactobacillus	1	Lactobacillus kunkeei strain 100-1 16S ribosomal RNA gene, partial sequence 99%	JQ009336.1
Crop	KF599390	2011-10-01	H20_7_1T	20	7	TSA	CO2	27F & 1522R	Bacteria	1	Firmicutes	1	Bacilli	1	Lactobacillales	1	Lactobacillaceae	1	Lactobacillus	1	Lactobacillus kunkeei strain 100-1 16S ribosomal RNA gene, partial sequence 99%	JQ009336.1
Crop	KF599392	2011-10-01	H20_8_1T	20	8	TSA	O2	27F & 1522R	Bacteria	1	Firmicutes	1	Bacilli	1	Lactobacillales	1	Lactobacillaceae	1	Lactobacillus	1	Lactobacillus kunkeei strain 100-1 16S ribosomal RNA gene, partial sequence 99%	JQ009336.1
Crop	KF599394	2011-10-01	H20_9_3T	20	9	TSA	CO2	27F & 1522R	Bacteria	1	Firmicutes	1	Bacilli	1	Lactobacillales	1	Lactobacillaceae	1	Lactobacillus	1	Lactobacillus kunkeei strain 100-1 16S ribosomal RNA gene, partial sequence 99%	JQ009336.1
Crop	KF599363	2011-10-01	H19_1_2T	19	1	TSA	CO2	27F & 1522R	Bacteria	1	Firmicutes	1	Bacilli	1	Lactobacillales	1	Lactobacillaceae	1	Lactobacillus	1	Lactobacillus sp. fhon13 16S ribosomal RNA gene, partial sequence 100%	HM534758.1
Crop	KF599374	2011-10-01	H19_7_2T	19	7	TSA	CO2	27F & 1522R	Bacteria	1	Firmicutes	1	Bacilli	1	Lactobacillales	1	Lactobacillaceae	1	Lactobacillus	1	Lactobacillus sp. fhon13 16S ribosomal RNA gene, partial sequence 99%	HM534758.1
Crop	KF599380	2011-10-01	H20_2_1T	20	2	TSA	CO2	27F & 1522R	Bacteria	1	Firmicutes	1	Bacilli	1	Lactobacillales	1	Lactobacillaceae	1	Lactobacillus	1	Lactobacillus sp. fhon13 16S ribosomal RNA gene, partial sequence 99%	HM534758.1
Crop	KF599386	2011-10-01	H20_5_2T	20	5	TSA	CO2	27F & 1522R	Bacteria	1	Firmicutes	1	Bacilli	1	Lactobacillales	1	Lactobacillaceae	1	Lactobacillus	1	Lactobacillus sp. fhon13 16S ribosomal RNA gene, partial sequence 99%	HM534758.1
Crop	KF599387	2011-10-01	H20_6_1T	20	6	TSA	CO2	27F & 1522R	Bacteria	1	Firmicutes	1	Bacilli	1	Lactobacillales	1	Lactobacillaceae	1	Lactobacillus	1	Lactobacillus sp. fhon13 16S ribosomal RNA gene, partial sequence 99%	HM534758.1

## Sheet: SDA 10-01-11
Table S2. Accession numbers and RDP and NCBI classifications for crop culture isolates
Source (Tissue/Pollen)	Accession	Date of Collection	Isolate #	Colony	Alimentary Tract	Media	Cultureing Environment	Primers Used for Sequence	Domain		Phylum		Class		Order		Family		Genus		NCBI Hits and %Identity
Crop	KF599455	2011-10-01	H14_1_1S	14	1	SDA	CO2	27F & 1522R	Bacteria	1	Firmicutes	1	Bacilli	1	Lactobacillales	1	Lactobacillaceae	1	Lactobacillus	1	Lactobacillus kunkeei strain 100-1 16S ribosomal RNA gene, partial sequence 100%	JQ009336.1
Crop	KF599457	2011-10-01	H14_2_2S	14	2	SDA	CO2	27F & 1522R	Bacteria	1	Firmicutes	1	Bacilli	1	Lactobacillales	1	Lactobacillaceae	1	Lactobacillus	1	Lactobacillus kunkeei strain 100-1 16S ribosomal RNA gene, partial sequence 100%	JQ009336.1
Crop	KF599459	2011-10-01	H14_3_2S	14	3	SDA	CO2	27F & 1522R	Bacteria	1	Firmicutes	1	Bacilli	1	Lactobacillales	1	Lactobacillaceae	1	Lactobacillus	1	Lactobacillus kunkeei strain 100-1 16S ribosomal RNA gene, partial sequence 100%	JQ009336.1
Crop	KF599462	2011-10-01	H14_6_1S	14	6	SDA	CO2	27F & 1522R	Bacteria	1	Firmicutes	1	Bacilli	1	Lactobacillales	1	Lactobacillaceae	1	Lactobacillus	1	Lactobacillus kunkeei strain 100-1 16S ribosomal RNA gene, partial sequence 100%	JQ009336.1
Crop	KF599466	2011-10-01	H14_8_2S	14	8	SDA	CO2	27F & 1522R	Bacteria	1	Firmicutes	1	Bacilli	1	Lactobacillales	1	Lactobacillaceae	1	Lactobacillus	1	Lactobacillus kunkeei strain 100-1 16S ribosomal RNA gene, partial sequence 100%	JQ009336.1
Crop	KF599468	2011-10-01	H19_2_2S	19	2	SDA	CO2	27F & 1522R	Bacteria	1	Firmicutes	1	Bacilli	1	Lactobacillales	1	Lactobacillaceae	1	Lactobacillus	1	Lactobacillus kunkeei strain 100-1 16S ribosomal RNA gene, partial sequence 100%	JQ009336.1
Crop	KF599470	2011-10-01	H19_3_2S	19	3	SDA	CO2	27F & 1522R	Bacteria	1	Firmicutes	1	Bacilli	1	Lactobacillales	1	Lactobacillaceae	1	Lactobacillus	1	Lactobacillus kunkeei strain 100-1 16S ribosomal RNA gene, partial sequence 100%	JQ009336.1
Crop	KF599472	2011-10-01	H19_6_2S	19	6	SDA	CO2	27F & 1522R	Bacteria	1	Firmicutes	1	Bacilli	1	Lactobacillales	1	Lactobacillaceae	1	Lactobacillus	1	Lactobacillus kunkeei strain 100-1 16S ribosomal RNA gene, partial sequence 100%	JQ009336.1
Crop	KF599474	2011-10-01	H19_7_2S	19	7	SDA	CO2	27F & 1522R	Bacteria	1	Firmicutes	1	Bacilli	1	Lactobacillales	1	Lactobacillaceae	1	Lactobacillus	1	Lactobacillus kunkeei strain 100-1 16S ribosomal RNA gene, partial sequence 100%	JQ009336.1
Crop	KF599476	2011-10-01	H19_8_2S	19	8	SDA	CO2	27F & 1522R	Bacteria	1	Firmicutes	1	Bacilli	1	Lactobacillales	1	Lactobacillaceae	1	Lactobacillus	1	Lactobacillus kunkeei strain 100-1 16S ribosomal RNA gene, partial sequence 100%	JQ009336.1
Crop	KF599485	2011-10-01	H20_5_2S	20	5	SDA	CO2	27F & 1522R	Bacteria	1	Firmicutes	1	Bacilli	1	Lactobacillales	1	Lactobacillaceae	1	Lactobacillus	1	Lactobacillus kunkeei strain 100-1 16S ribosomal RNA gene, partial sequence 100%	JQ009336.1
Crop	KF599464	2011-10-01	H14_7_1S	14	7	SDA	CO2	27F & 1522R	Bacteria	1	Firmicutes	1	Bacilli	1	Lactobacillales	1	Lactobacillaceae	1	Lactobacillus	1	Lactobacillus kunkeei strain 100-1 16S ribosomal RNA gene, partial sequence 98%	JQ009336.1
Crop	KF599456	2011-10-01	H14_2_1S	14	2	SDA	CO2	27F & 1522R	Bacteria	1	Firmicutes	1	Bacilli	1	Lactobacillales	1	Lactobacillaceae	1	Lactobacillus	1	Lactobacillus kunkeei strain 100-1 16S ribosomal RNA gene, partial sequence 99%	JQ009336.1
Crop	KF599458	2011-10-01	H14_3_1S	14	3	SDA	CO2	27F & 1522R	Bacteria	1	Firmicutes	1	Bacilli	1	Lactobacillales	1	Lactobacillaceae	1	Lactobacillus	1	Lactobacillus kunkeei strain 100-1 16S ribosomal RNA gene, partial sequence 99%	JQ009336.1
Crop	KF599463	2011-10-01	H14_6_2S	14	6	SDA	CO2	27F & 1522R	Bacteria	1	Firmicutes	1	Bacilli	1	Lactobacillales	1	Lactobacillaceae	1	Lactobacillus	1	Lactobacillus kunkeei strain 100-1 16S ribosomal RNA gene, partial sequence 99%	JQ009336.1
Crop	KF599469	2011-10-01	H19_3_1S	19	3	SDA	CO2	27F & 1522R	Bacteria	1	Firmicutes	1	Bacilli	1	Lactobacillales	1	Lactobacillaceae	1	Lactobacillus	1	Lactobacillus kunkeei strain 100-1 16S ribosomal RNA gene, partial sequence 99%	JQ009336.1
Crop	KF599471	2011-10-01	H19_3_3S	19	3	SDA	CO2	27F & 1522R	Bacteria	1	Firmicutes	1	Bacilli	1	Lactobacillales	1	Lactobacillaceae	1	Lactobacillus	1	Lactobacillus kunkeei strain 100-1 16S ribosomal RNA gene, partial sequence 99%	JQ009336.1
Crop	KF599480	2011-10-01	H20_2_2S	20	2	SDA	CO2	27F & 1522R	Bacteria	1	Firmicutes	1	Bacilli	1	Lactobacillales	1	Lactobacillaceae	1	Lactobacillus	1	Lactobacillus kunkeei strain 100-1 16S ribosomal RNA gene, partial sequence 99%	JQ009336.1
Crop	KF599482	2011-10-01	H20_3_3S	20	3	SDA	CO2	27F & 1522R	Bacteria	1	Firmicutes	1	Bacilli	1	Lactobacillales	1	Lactobacillaceae	1	Lactobacillus	1	Lactobacillus kunkeei strain 100-1 16S ribosomal RNA gene, partial sequence 99%	JQ009336.1
Crop	KF599484	2011-10-01	H20_5_1S	20	5	SDA	CO2	27F & 1522R	Bacteria	1	Firmicutes	1	Bacilli	1	Lactobacillales	1	Lactobacillaceae	1	Lactobacillus	1	Lactobacillus kunkeei strain 100-1 16S ribosomal RNA gene, partial sequence 99%	JQ009336.1
Crop	KF599489	2011-10-01	H20_8_2S	20	8	SDA	CO2	27F & 1522R	Bacteria	1	Firmicutes	1	Bacilli	1	Lactobacillales	1	Lactobacillaceae	1	Lactobacillus	1	Lactobacillus kunkeei strain 100-1 16S ribosomal RNA gene, partial sequence 99%	JQ009336.1
Crop	KF599491	2011-10-01	H20_9_2S	20	9	SDA	CO2	27F & 1522R	Bacteria	1	Firmicutes	1	Bacilli	1	Lactobacillales	1	Lactobacillaceae	1	Lactobacillus	1	Lactobacillus kunkeei strain 100-1 16S ribosomal RNA gene, partial sequence 99%	JQ009336.1
Crop	KF599490	2011-10-01	H20_9_1S	20	9	SDA	CO2	27F & 1522R	Bacteria	1	Firmicutes	1	Bacilli	1	Lactobacillales	1	Lactobacillaceae	1	Lactobacillus	0.98	Lactobacillus sp. fhon13 16S ribosomal RNA gene, partial sequence 100%	HM534758.1
Crop	KF599488	2011-10-01	H20_8_1S	20	8	SDA	CO2	27F & 1522R	Bacteria	1	Firmicutes	1	Bacilli	1	Lactobacillales	1	Lactobacillaceae	1	Lactobacillus	1	Lactobacillus sp. fhon13 16S ribosomal RNA gene, partial sequence 99%	HM534758.1
Crop	KF599477	2011-10-01	H20_10_1S	20	10	SDA	CO2	27F & 1522R	Bacteria	1	Proteobacteria	1	Alphaproteobacteria	1	Rhodospirillales	1	Acetobacteraceae	1	Saccharibacter	0.83	Saccharibacter sp. Am 22 partial 16S rRNA gene, isolate Am 22 99%	AJ971906.1
Crop	KF599467	2011-10-01	H19_10_2S	19	10	SDA	CO2	27F & 1522R	Bacteria	1	Proteobacteria	1	Alphaproteobacteria	1	Rhodospirillales	1	Acetobacteraceae	1	Saccharibacter	0.78	Uncultured Acetobacteraceae bacterium clone SHAJ053 16S ribosomal RNA gene, partial sequence 98%	HM108484.1
Crop	KF599473	2011-10-01	H19_7_1S	19	7	SDA	CO2	27F & 1522R	Bacteria	1	Proteobacteria	1	Alphaproteobacteria	1	Rhodospirillales	1	Acetobacteraceae	1	Saccharibacter	0.37	Uncultured Acetobacteraceae bacterium clone SHAJ056 16S ribosomal RNA gene, partial sequence 98%	HM108486.1
Crop	KF599483	2011-10-01	H20_4_2S	20	4	SDA	CO2	27F & 1522R	Bacteria	1	Proteobacteria	1	Alphaproteobacteria	1	Rhodospirillales	1	Acetobacteraceae	1	Saccharibacter	0.31	Uncultured Acetobacteraceae bacterium clone SHAJ056 16S ribosomal RNA gene, partial sequence 98%	HM108486.1
Crop	KF599486	2011-10-01	H20_6_1S	20	6	SDA	CO2	27F & 1522R	Bacteria	1	Proteobacteria	1	Alphaproteobacteria	1	Rhodospirillales	1	Acetobacteraceae	1	Neokomagataea	0.38	Uncultured Acetobacteraceae bacterium clone SHAJ056 16S ribosomal RNA gene, partial sequence 98%	HM108486.1
Crop	KF599478	2011-10-01	H20_10_2S	20	10	SDA	CO2	27F & 1522R	Bacteria	1	Proteobacteria	1	Alphaproteobacteria	1	Rhodospirillales	1	Acetobacteraceae	1	Saccharibacter	0.69	Uncultured Acetobacteraceae bacterium clone SHAJ056 16S ribosomal RNA gene, partial sequence 99%	HM108486.1
Crop	KF599481	2011-10-01	H20_3_2S	20	3	SDA	CO2	27F & 1522R	Bacteria	1	Proteobacteria	1	Alphaproteobacteria	1	Rhodospirillales	1	Acetobacteraceae	1	Neokomagataea	0.43	Uncultured Acetobacteraceae bacterium clone SHAJ056 16S ribosomal RNA gene, partial sequence 99%	HM108486.1
Crop	KF599487	2011-10-01	H20_7_2S	20	7	SDA	CO2	27F & 1522R	Bacteria	1	Proteobacteria	1	Alphaproteobacteria	1	Rhodospirillales	1	Acetobacteraceae	1	Saccharibacter	0.78	Uncultured Acetobacteraceae bacterium clone SHAJ056 16S ribosomal RNA gene, partial sequence 99%	HM108486.1
Crop	KF599479	2011-10-01	H20_2_1S	20	2	SDA	CO2	27F & 1522R	Bacteria	1	Proteobacteria	1	Alphaproteobacteria	1	Rhodospirillales	1	Acetobacteraceae	1	Neokomagataea	0.62	Uncultured Acetobacteraceae bacterium clone SHAJ056 16S ribosomal RNA gene, partial sequence 99%	HM108486.1
Crop	KF599460	2011-10-01	H14_4_2S	14	4	SDA	CO2	27F & 1522R	Bacteria	1	Proteobacteria	1	Alphaproteobacteria	1	Rhodospirillales	1	Acetobacteraceae	1	Saccharibacter	0.83	Uncultured alpha proteobacterium partial 16S rRNA gene, isolate Am 11 99%	AJ971850.1
Crop	KF599461	2011-10-01	H14_5_2S	14	5	SDA	CO2	27F & 1522R	Bacteria	1	Proteobacteria	1	Alphaproteobacteria	1	Rhodospirillales	1	Acetobacteraceae	1	Saccharibacter	0.79	Uncultured alpha proteobacterium partial 16S rRNA gene, isolate Am 11 99%	AJ971850.1
Crop	KF599465	2011-10-01	H14_7_2S	14	7	SDA	CO2	27F & 1522R	Bacteria	1	Proteobacteria	1	Alphaproteobacteria	1	Rhodospirillales	1	Acetobacteraceae	1	Saccharibacter	0.78	Uncultured alpha proteobacterium partial 16S rRNA gene, isolate Am 11 99%	AJ971850.1
Crop	KF599475	2011-10-01	H19_8_1S	19	8	SDA	CO2	27F & 1522R	Bacteria	1	Proteobacteria	1	Alphaproteobacteria	1	Rhodospirillales	1	Acetobacteraceae	1	Saccharibacter	0.73	Uncultured alpha proteobacterium partial 16S rRNA gene, isolate Am 11 99%	AJ971850.1

## Sheet: MRS 10-01-11
Table S2. Accession numbers and RDP and NCBI classifications for crop culture isolates
Source (Tissue/Pollen)	Accession	Date of Collection	Isolate #	Colony	Alimentary Tract	Media	Cultureing Environment	Primers Used for Sequence	Domain		Phylum		Class		Order		Family		Genus		NCBI Hits and %Identity
Crop	KF599413	2011-10-01	H20_5_2M	20	5	MRS	CO2	27F & 1522R	Bacteria	1	Firmicutes	1	Bacilli	1	Lactobacillales	1	Leuconostocaceae	1	Fructobacillus	1	Fructobacillus fructosus gene for 16S rRNA, partial sequence, strain NBRC 3516 99%	AB680098.1
Crop	KF599414	2011-10-01	H20_7_1M	20	7	MRS	CO2	27F & 1522R	Bacteria	1	Firmicutes	1	Bacilli	1	Lactobacillales	1	Leuconostocaceae	1	Fructobacillus	1	Fructobacillus fructosus gene for 16S rRNA, partial sequence, strain NBRC 3516 99%	AB680098.1
Crop	KF599415	2011-10-01	H20_7_2M	20	7	MRS	CO2	27F & 1522R	Bacteria	1	Firmicutes	1	Bacilli	1	Lactobacillales	1	Leuconostocaceae	1	Fructobacillus	1	Fructobacillus fructosus gene for 16S rRNA, partial sequence, strain NBRC 3516 99%	AB680098.1
Crop	KF599399	2011-10-01	H14_4_1M	14	4	MRS	O2	27F & 1522R	Bacteria	1	Firmicutes	1	Bacilli	1	Lactobacillales	1	Lactobacillaceae	1	Lactobacillus	1	Lactobacillus kunkeei strain 100-1 16S ribosomal RNA gene, partial sequence 100%	JQ009336.1
Crop	KF599407	2011-10-01	H19_6_1M	19	6	MRS	CO2	27F & 1522R	Bacteria	1	Firmicutes	1	Bacilli	1	Lactobacillales	1	Lactobacillaceae	1	Lactobacillus	1	Lactobacillus kunkeei strain 100-1 16S ribosomal RNA gene, partial sequence 100%	JQ009336.1
Crop	KF599408	2011-10-01	H19_8_1M	19	8	MRS	CO2	27F & 1522R	Bacteria	1	Firmicutes	1	Bacilli	1	Lactobacillales	1	Lactobacillaceae	1	Lactobacillus	1	Lactobacillus kunkeei strain 100-1 16S ribosomal RNA gene, partial sequence 100%	JQ009336.1
Crop	KF599410	2011-10-01	H20_1_1M	20	1	MRS	CO2	27F & 1522R	Bacteria	1	Firmicutes	1	Bacilli	1	Lactobacillales	1	Lactobacillaceae	1	Lactobacillus	1	Lactobacillus kunkeei strain 100-1 16S ribosomal RNA gene, partial sequence 100%	JQ009336.1
Crop	KF599416	2011-10-01	H20_8_2M	20	8	MRS	CO2	27F & 1522R	Bacteria	1	Firmicutes	1	Bacilli	1	Lactobacillales	1	Lactobacillaceae	1	Lactobacillus	1	Lactobacillus kunkeei strain 100-1 16S ribosomal RNA gene, partial sequence 100%	JQ009336.1
Crop	KF599417	2011-10-01	H20_9_1M	20	9	MRS	CO2	27F & 1522R	Bacteria	1	Firmicutes	1	Bacilli	1	Lactobacillales	1	Lactobacillaceae	1	Lactobacillus	1	Lactobacillus kunkeei strain 100-1 16S ribosomal RNA gene, partial sequence 100%	JQ009336.1
Crop	KF599418	2011-10-01	H20_9_2M	20	9	MRS	CO2	27F & 1522R	Bacteria	1	Firmicutes	1	Bacilli	1	Lactobacillales	1	Lactobacillaceae	1	Lactobacillus	1	Lactobacillus kunkeei strain 100-1 16S ribosomal RNA gene, partial sequence 100%	JQ009336.1
Crop	KF599395	2011-10-01	H14_10_1M	14	10	MRS	CO2	27F & 1522R	Bacteria	1	Firmicutes	1	Bacilli	1	Lactobacillales	1	Lactobacillaceae	1	Lactobacillus	1	Lactobacillus kunkeei strain 100-1 16S ribosomal RNA gene, partial sequence 99%	JQ009336.1
Crop	KF599396	2011-10-01	H14_2_1M	14	2	MRS	CO2	27F & 1522R	Bacteria	1	Firmicutes	1	Bacilli	1	Lactobacillales	1	Lactobacillaceae	1	Lactobacillus	1	Lactobacillus kunkeei strain 100-1 16S ribosomal RNA gene, partial sequence 99%	JQ009336.1
Crop	KF599397	2011-10-01	H14_3_2_1M	14	3	MRS	CO2	27F & 1522R	Bacteria	1	Firmicutes	1	Bacilli	1	Lactobacillales	1	Lactobacillaceae	1	Lactobacillus	1	Lactobacillus kunkeei strain 100-1 16S ribosomal RNA gene, partial sequence 99%	JQ009336.1
Crop	KF599400	2011-10-01	H14_7_1M	14	7	MRS	CO2	27F & 1522R	Bacteria	1	Firmicutes	1	Bacilli	1	Lactobacillales	1	Lactobacillaceae	1	Lactobacillus	1	Lactobacillus kunkeei strain 100-1 16S ribosomal RNA gene, partial sequence 99%	JQ009336.1
Crop	KF599401	2011-10-01	H14_7_2M	14	7	MRS	CO2	27F & 1522R	Bacteria	1	Firmicutes	1	Bacilli	1	Lactobacillales	1	Lactobacillaceae	1	Lactobacillus	1	Lactobacillus kunkeei strain 100-1 16S ribosomal RNA gene, partial sequence 99%	JQ009336.1
Crop	KF599402	2011-10-01	H14_8_2M	14	8	MRS	CO2	27F & 1522R	Bacteria	1	Firmicutes	1	Bacilli	1	Lactobacillales	1	Lactobacillaceae	1	Lactobacillus	0.97	Lactobacillus kunkeei strain 100-1 16S ribosomal RNA gene, partial sequence 99%	JQ009336.1
Crop	KF599403	2011-10-01	H19_2_2M	19	2	MRS	CO2	27F & 1522R	Bacteria	1	Firmicutes	1	Bacilli	1	Lactobacillales	1	Lactobacillaceae	1	Lactobacillus	1	Lactobacillus kunkeei strain 100-1 16S ribosomal RNA gene, partial sequence 99%	JQ009336.1
Crop	KF599404	2011-10-01	H19_3_2M	19	3	MRS	CO2	27F & 1522R	Bacteria	1	Firmicutes	1	Bacilli	1	Lactobacillales	1	Lactobacillaceae	1	Lactobacillus	1	Lactobacillus kunkeei strain 100-1 16S ribosomal RNA gene, partial sequence 99%	JQ009336.1
Crop	KF599405	2011-10-01	H19_5_1M	19	5	MRS	CO2	27F & 1522R	Bacteria	1	Firmicutes	1	Bacilli	1	Lactobacillales	1	Lactobacillaceae	1	Lactobacillus	1	Lactobacillus kunkeei strain 100-1 16S ribosomal RNA gene, partial sequence 99%	JQ009336.1
Crop	KF599406	2011-10-01	H19_5_2M	19	5	MRS	CO2	27F & 1522R	Bacteria	1	Firmicutes	1	Bacilli	1	Lactobacillales	1	Lactobacillaceae	1	Lactobacillus	1	Lactobacillus kunkeei strain 100-1 16S ribosomal RNA gene, partial sequence 99%	JQ009336.1
Crop	KF599409	2011-10-01	H19_9_2M	19	9	MRS	CO2	27F & 1522R	Bacteria	1	Firmicutes	1	Bacilli	1	Lactobacillales	1	Lactobacillaceae	1	Lactobacillus	1	Lactobacillus kunkeei strain 100-1 16S ribosomal RNA gene, partial sequence 99%	JQ009336.1
Crop	KF599412	2011-10-01	H20_5_1M	20	5	MRS	O2	27F & 1522R	Bacteria	1	Firmicutes	1	Bacilli	1	Lactobacillales	1	Lactobacillaceae	1	Lactobacillus	1	Lactobacillus kunkeei strain 100-1 16S ribosomal RNA gene, partial sequence 99%	JQ009336.1
Crop	KF599398	2011-10-01	H14_3_2_2M	14	3	MRS	CO2	27F & 1522R	Bacteria	1	Firmicutes	1	Bacilli	1	Lactobacillales	1	Lactobacillaceae	1	Lactobacillus	1	Lactobacillus sp. fhon13 16S ribosomal RNA gene, partial sequence 99%	HM534758.1
Crop	KF599411	2011-10-01	H20_2_1M	20	2	MRS	CO2	27F & 1522R	Bacteria	1	Firmicutes	1	Bacilli	1	Lactobacillales	1	Lactobacillaceae	1	Lactobacillus	0.99	Lactobacillus sp. fhon13 16S ribosomal RNA gene, partial sequence 99%	HM534758.1

[truncated: 1 more sheets: BHI 10-01-11]
